# Supplementary material for: Events of alternative splicing in head and neck cancer via RNA sequencing – an update
Source: BMC Genomics. 2019 Jun 3;20:442. doi: 10.1186/s12864-019-5794-y (PMC6545735; doi:10.1186/s12864-019-5794-y)
Supplement: Supplementary file 4 — Table S1. describing the reason for including or excluding each study. (XLS 232 kb) [file 12864_2019_5794_MOESM4_ESM.xls]

## Sheet: All resources combined
S.No	PubMed ID	Tumor type	Software used	Excluded with reason
1	PMID: 28553938			Records on cancers other than head and neck region
2	PMID: 28493890			Records on cancers other than head and neck region
3	PMID: 28223168			Records on cancers other than head and neck region
4	PMID: 28098904			Records on cancers other than head and neck region
5	PMID: 28082404			Records on cancers other than head and neck region
6	PMID: 27621578			The records having RNA-Seq data but were not analyzed for identifying alternate splicing
7	PMID: 27587658			Records on cancers other than head and neck region
8	PMID: 27565572			Records on cancers other than head and neck region
9	PMID: 27432315			Records on cancers other than head and neck region
10	PMID: 27264950			Records on cancers other than head and neck region
11	PMID: 27153587			Records on cancers other than head and neck region
12	PMID: 26901859			The records not having RNA-Seq data
13	PMID: 26875870			Non relevant review
14	PMID: 26845116			Records on cancers other than head and neck region
15	PMID: 26775595			Records on cancers other than head and neck region
16	PMID: 26711644			Records on cancers other than head and neck region
17	PMID: 26646278			Records on cancers other than head and neck region
18	PMID: 26631070			The records having RNA-Seq data but were not analyzed for identifying alternate splicing
19	PMID: 26606055			Records on cancers other than head and neck region
20	PMID: 26554648			Records on cancers other than head and neck region
21	PMID: 26522722			Records on cancers other than head and neck region
22	PMID: 26498364	Oral cancer cells	AltAnalyze software
23	PMID: 26434412			Non relevant review
24	PMID: 26416554			The records not having RNA-Seq data
25	PMID: 26271415			Records on cancers other than head and neck region
26	PMID: 26251276			The records having RNA-Seq data but were not analyzed for identifying alternate splicing
27	PMID: 26238073			Records on cancers other than head and neck region
28	PMID: 26229396			Records on cancers other than head and neck region
29	PMID: 26135620			Records on cancers other than head and neck region
30	PMID: 26073078			Records on cancers other than head and neck region
31	PMID: 25923053			The records not having RNA-Seq data
32	PMID: 25884497			Records on cancers other than head and neck region
33	PMID: 25830670			Records on cancers other than head and neck region
34	PMID: 25671302			Records on cancers other than head and neck region
35	PMID: 25669972			Records on cancers other than head and neck region
36	PMID: 25630972			Records on cancers other than head and neck region
37	PMID: 25592567			Records on cancers other than head and neck region
38	PMID: 25526730			Records on cancers other than head and neck region
39	PMID: 25481564			Records on cancers other than head and neck region
40	PMID: 25424858			Records on cancers other than head and neck region
41	PMID: 25108200			Records on cancers other than head and neck region
42	PMID: 25091051			Records on cancers other than head and neck region
43	PMID: 25079552			Records on cancers other than head and neck region
44	PMID: 25034693			Records on cancers other than head and neck region
45	PMID: 24859531			Records on cancers other than head and neck region
46	PMID: 24675808			The records not having RNA-Seq data
47	PMID: 24646369			Records on cancers other than head and neck region
48	PMID: 24622401			Records on cancers other than head and neck region
49	PMID: 24571613			Records on cancers other than head and neck region
50	PMID: 24563233			The records not having RNA-Seq data
51	PMID: 24428911			The records not having RNA-Seq data
52	PMID: 24257595			The records on viruses
53	PMID: 24158655			The records not having RNA-Seq data
54	PMID: 24141781			The records not having RNA-Seq data
55	PMID: 24077665			The records having RNA-Seq data but were not analyzed for identifying alternate splicing
56	PMID: 24071698			The records published in languages other than English
57	PMID: 23766440			Records on cancers other than head and neck region
58	PMID: 23666063			Records on cancers other than head and neck region
59	PMID: 23566772	Buccal mucosa squamous cell carcinoma (BMSCC)	SpliceMap
60	PMID: 23460839			Records on cancers other than head and neck region
61	PMID: 23444225			Records on cancers other than head and neck region
62	PMID: 23430818			Records on cancers other than head and neck region
63	PMID: 23409773			Records on cancers other than head and neck region
64	PMID: 23314567			Records on cancers other than head and neck region
65	PMID: 23152425			The records not having RNA-Seq data
66	PMID: 23128391			Records on cancers other than head and neck region
67	PMID: 23052255			Records on cancers other than head and neck region
68	PMID: 22975805			Records on cancers other than head and neck region
69	PMID: 22859706			Records on cancers other than head and neck region
70	PMID: 22806361			Records on cancers other than head and neck region
71	PMID: 22799388			The records not having RNA-Seq data
72	PMID: 22591718			Records on cancers other than head and neck region
73	PMID: 22567897			Non relevant review
74	PMID: 22553170			Records on cancers other than head and neck region
75	PMID: 22462637			The records on syndromes
76	PMID: 22416874			The records not having RNA-Seq data
77	PMID: 22238681			Records on cancers other than head and neck region
78	PMID: 22188260			Records on cancers other than head and neck region
79	PMID: 21949640			Records on cancers other than head and neck region
80	PMID: 21622622			Records on cancers other than head and neck region
81	PMID: 21394648			The records not having RNA-Seq data
82	PMID: 21266177			Records on cancers other than head and neck region
83	PMID: 21118496			Records on cancers other than head and neck region
84	PMID: 21041478			Records on cancers other than head and neck region
85	PMID: 20938052			Records on cancers other than head and neck region
86	PMID: 20727893			Records on cancers other than head and neck region
87	PMID: 20691260			Records on cancers other than head and neck region
88	PMID: 20541447			The records on syndromes
89	PMID: 20131318			The records not having RNA-Seq data
90	PMID: 20033787			The records not having RNA-Seq data
91	PMID: 19936049			The records not having RNA-Seq data
92	PMID: 19494365			The records not having RNA-Seq data
93	PMID: 19479822			Records on cancers other than head and neck region
94	PMID: 19467152			The records not having RNA-Seq data
95	PMID: 19447873			Records on cancers other than head and neck region
96	PMID: 19416963			The records not having RNA-Seq data
97	PMID: 19249242			Records on cancers other than head and neck region
98	PMID: 19024105			Records on cancers other than head and neck region
99	PMID: 18927117			Records on cancers other than head and neck region
100	PMID: 18614630			The records on viruses
101	PMID: 18592003			Records on cancers other than head and neck region
102	PMID: 18588873			The records not having RNA-Seq data
103	PMID: 18472110			The records not having RNA-Seq data
104	PMID: 17982254			The records not having RNA-Seq data
105	PMID: 17877643			The records not having RNA-Seq data
106	PMID: 17569023			The records not having RNA-Seq data
107	PMID: 17452979			Records on cancers other than head and neck region
108	PMID: 17334634			The records not having RNA-Seq data
109	PMID: 17266182			Records on cancers other than head and neck region
110	PMID: 17054774			Records on cancers other than head and neck region
111	PMID: 17010196			Records on cancers other than head and neck region
112	PMID: 16995940			The records not having RNA-Seq data
113	PMID: 16878147			The records not having RNA-Seq data
114	PMID: 16861979			Records on cancers other than head and neck region
115	PMID: 16596194			Records on cancers other than head and neck region
116	PMID: 16580182			The records not having RNA-Seq data
117	PMID: 16217771			The records not having RNA-Seq data
118	PMID: 16203624			Records on cancers other than head and neck region
119	PMID: 16177568			The records not having RNA-Seq data
120	PMID: 16122883			Records on cancers other than head and neck region
121	PMID: 16114033			The records not having RNA-Seq data
122	PMID: 15989082			Records on cancers other than head and neck region
123	PMID: 15948147			The records not having RNA-Seq data
124	PMID: 15940269			The records not having RNA-Seq data
125	PMID: 15856293			The records not having RNA-Seq data
126	PMID: 15853821			The records not having RNA-Seq data
127	PMID: 15843153			The records not having RNA-Seq data
128	PMID: 23923566			The records not having RNA-Seq data
129	PMID: 15753364			The records not having RNA-Seq data
130	PMID: 15721309			The records not having RNA-Seq data
131	PMID: 15701831			Records on cancers other than head and neck region
132	PMID: 15625370			Records on cancers other than head and neck region
133	PMID: 15623596			The records not having RNA-Seq data
134	PMID: 15586241			The records not having RNA-Seq data
135	PMID: 15580286			Records on cancers other than head and neck region
136	PMID: 15578720			The records not having RNA-Seq data
137	PMID: 15498584			Records on cancers other than head and neck region
138	PMID: 15484318			Records on cancers other than head and neck region
139	PMID: 15374639			Records on cancers other than head and neck region
140	PMID: 15355897			The records not having RNA-Seq data
141	PMID: 15312379			The records published in languages other than English
142	PMID: 15311055			Records on cancers other than head and neck region
143	PMID: 15254688			Records on cancers other than head and neck region
144	PMID: 15225156			Records on cancers other than head and neck region
145	PMID: 15180946			Records on cancers other than head and neck region
146	PMID: 15077124			The records not having RNA-Seq data
147	PMID: 14981537			Records on cancers other than head and neck region
148	PMID: 14969745			The records not having RNA-Seq data
149	PMID: 14741047			Records on cancers other than head and neck region
150	PMID: 14696120			Records on cancers other than head and neck region
151	PMID: 14674142			The records published in languages other than English
152	PMID: 14639658			Records on cancers other than head and neck region
153	PMID: 14639621			Records on cancers other than head and neck region
154	PMID: 14624010			The records not having RNA-Seq data
155	PMID: 12906858			The records not having RNA-Seq data
156	PMID: 12869302			Records on cancers other than head and neck region
157	PMID: 12821948			The records not having RNA-Seq data
158	PMID: 12817473			The records not having RNA-Seq data
159	PMID: 12815039			The records not having RNA-Seq data
160	PMID: 12810662			The records not having RNA-Seq data
161	PMID: 12747968			The records not having RNA-Seq data
162	PMID: 12734196			The records not having RNA-Seq data
163	PMID: 12669264			The records not having RNA-Seq data
164	PMID: 12566316			Records on cancers other than head and neck region
165	PMID: 12538601			The records not having RNA-Seq data
166	PMID: 12466900			The records not having RNA-Seq data
167	PMID: 12384809			Records on cancers other than head and neck region
168	PMID: 12234988			Records on cancers other than head and neck region
169	PMID: 12203787			The records not having RNA-Seq data
170	PMID: 12183439			Records on cancers other than head and neck region
171	PMID: 12124351			Records on cancers other than head and neck region
172	PMID: 12039098			The records not having RNA-Seq data
173	PMID: 11867619			The records not having RNA-Seq data
174	PMID: 11830556			Records on cancers other than head and neck region
175	PMID: 11812086			The records not having RNA-Seq data
176	PMID: 11776973			The records not having RNA-Seq data
177	PMID: 11774267			Records on cancers other than head and neck region
178	PMID: 11753648			Records on cancers other than head and neck region
179	PMID: 11751411			Records on cancers other than head and neck region
180	PMID: 11703096			The records not having RNA-Seq data
181	PMID: 11675018			Records on cancers other than head and neck region
182	PMID: 11595752			Records on cancers other than head and neck region
183	PMID: 11494132			The records not having RNA-Seq data
184	PMID: 11432748			The records not having RNA-Seq data
185	PMID: 11406281			The records not having RNA-Seq data
186	PMID: 11361006			The records not having RNA-Seq data
187	PMID: 11314039			Records on cancers other than head and neck region
188	PMID: 11313015			Records on cancers other than head and neck region
189	PMID: 11309326			Records on cancers other than head and neck region
190	PMID: 11306511			Records on cancers other than head and neck region
191	PMID: 11301342			The records not having RNA-Seq data
192	PMID: 11298758			Records on cancers other than head and neck region
193	PMID: 11290415			The records not having RNA-Seq data
194	PMID: 11280766			Records on cancers other than head and neck region
195	PMID: 11245980			Records on cancers other than head and neck region
196	PMID: 11168366			The records not having RNA-Seq data
197	PMID: 11161793			The records not having RNA-Seq data
198	PMID: 11135323			Records on cancers other than head and neck region
199	PMID: 11107050			Records on cancers other than head and neck region
200	PMID: 11097842			The records not having RNA-Seq data
201	PMID: 11091205			The records not having RNA-Seq data
202	PMID: 11071864			The records not having RNA-Seq data
203	PMID: 11038365			Records on cancers other than head and neck region
204	PMID: 10998068			The records not having RNA-Seq data
205	PMID: 10980616			Records on cancers other than head and neck region
206	PMID: 10973799			The records not having RNA-Seq data
207	PMID: 10848880			The records not having RNA-Seq data
208	PMID: 10810295			The records not having RNA-Seq data
209	PMID: 10799889			Records on cancers other than head and neck region
210	PMID: 10713061			The records not having RNA-Seq data
211	PMID: 10709093			Records on cancers other than head and neck region
212	PMID: 10679019			The records not having RNA-Seq data
213	PMID: 10632569			The records not having RNA-Seq data
214	PMID: 10611237			The records not having RNA-Seq data
215	PMID: 10597188			Records on cancers other than head and neck region
216	PMID: 10523826			The records not having RNA-Seq data
217	PMID: 10493952			Records on cancers other than head and neck region
218	PMID: 10485918			The records not having RNA-Seq data
219	PMID: 10484779			The records not having RNA-Seq data
220	PMID: 10397166			The records not having RNA-Seq data
221	PMID: 10384152			The records not having RNA-Seq data
222	PMID: 10352938			Records on cancers other than head and neck region
223	PMID: 10082426			The records not having RNA-Seq data
224	PMID: 9777953			Records on cancers other than head and neck region
225	PMID: 9710451			The records not having RNA-Seq data
226	PMID: 9672068			Records on cancers other than head and neck region
227	PMID: 9562620			The records not having RNA-Seq data
228	PMID: 9610356			Records on cancers other than head and neck region
229	PMID: 9607110			The records not having RNA-Seq data
230	PMID: 9528987			The records not having RNA-Seq data
231	PMID: 9528950			The records not having RNA-Seq data
232	PMID: 9528941			The records not having RNA-Seq data
233	PMID: 9510475			Records on cancers other than head and neck region
234	PMID: 9359844			The records not having RNA-Seq data
235	PMID: 9377550			Records on cancers other than head and neck region
236	PMID: 9270016			The records not having RNA-Seq data
237	PMID: 9288629			Records on cancers other than head and neck region
238	PMID: 9180140			The records not having RNA-Seq data
239	PMID: 9153428			Records on cancers other than head and neck region
240	PMID: 9169140			The records not having RNA-Seq data
241	PMID: 9128242			The records not having RNA-Seq data
242	PMID: 9103405			Records on cancers other than head and neck region
243	PMID: 9010321			Records on cancers other than head and neck region
244	PMID: 8891346			The records not having RNA-Seq data
245	PMID: 8781446			The records not having RNA-Seq data
246	PMID: 8661122			The records not having RNA-Seq data
247	PMID: 8652539			Records on cancers other than head and neck region
248	PMID: 8653678			Records on cancers other than head and neck region
249	PMID: 8668345			Records on cancers other than head and neck region
250	PMID: 8631886			Records on cancers other than head and neck region
251	PMID: 8733131			The records not having RNA-Seq data
252	PMID: 8621584			The records not having RNA-Seq data
253	PMID: 8647091			The records not having RNA-Seq data
254	PMID: 8655705			Records on cancers other than head and neck region
255	PMID: 8608966			The records not having RNA-Seq data
256	PMID: 8649806			Records on cancers other than head and neck region
257	PMID: 8579108			Records on cancers other than head and neck region
258	PMID: 8717365			Records on cancers other than head and neck region
259	PMID: 8537388			Records on cancers other than head and neck region
260	PMID: 7565764			The records not having RNA-Seq data
261	PMID: 8576101			The records not having RNA-Seq data
262	PMID: 7545538			Records on cancers other than head and neck region
263	PMID: 7675441			The records not having RNA-Seq data
264	PMID: 7490101			The records not having RNA-Seq data
265	PMID: 8846023			Records on cancers other than head and neck region
266	PMID: 7607211			The records not having RNA-Seq data
267	PMID: 7539775			The records not having RNA-Seq data
268	PMID: 7759551			The records not having RNA-Seq data
269	PMID: 7743517			Records on cancers other than head and neck region
270	PMID: 7750631			The records not having RNA-Seq data
271	PMID: 7720641			The records not having RNA-Seq data
272	PMID: 7615724			The records on viruses
273	PMID: 7536236			The records not having RNA-Seq data
274	PMID: 7882349			The records not having RNA-Seq data
275	PMID: 7721940			The records not having RNA-Seq data
276	PMID: 7737192			The records not having RNA-Seq data
277	PMID: 7758837			The records not having RNA-Seq data
278	PMID: 7815492			The records on viruses
279	PMID: 7961757			The records not having RNA-Seq data
280	PMID: 7927891			Records on cancers other than head and neck region
281	PMID: 8069866			Records on cancers other than head and neck region
282	PMID: 7946273			The records not having RNA-Seq data
283	PMID: 7803853			Records on cancers other than head and neck region
284	PMID: 8033105			Records on cancers other than head and neck region
285	PMID: 7949223			The records not having RNA-Seq data
286	PMID: 8179637			The records not having RNA-Seq data
287	PMID: 7513991			Records on cancers other than head and neck region
288	PMID: 7509777			Records on cancers other than head and neck region
289	PMID: 8299725			The records not having RNA-Seq data
290	PMID: 8162073			The records not having RNA-Seq data
291	PMID: 7517252			Records on cancers other than head and neck region
292	PMID: 8275490			The records not having RNA-Seq data
293	PMID: 7866434			Records on cancers other than head and neck region
294	PMID: 7515025			Records on cancers other than head and neck region
295	PMID: 8413205			The records not having RNA-Seq data
296	PMID: 7505677			The records not having RNA-Seq data
297	PMID: 7690739			The records on viruses
298	PMID: 8325706			The records not having RNA-Seq data
299	PMID: 7685762			The records not having RNA-Seq data
300	PMID: 8481475			The records not having RNA-Seq data
301	PMID: 8384081			Records on cancers other than head and neck region
302	PMID: 7916651			Records on cancers other than head and neck region
303	PMID: 1333130			The records on viruses
304	PMID: 1357452			The records not having RNA-Seq data
305	PMID: 1319059			The records not having RNA-Seq data
306	PMID: 1313931			The records not having RNA-Seq data
307	PMID: 1761559			The records not having RNA-Seq data
308	PMID: 1893964			The records not having RNA-Seq data
309	PMID: 1716516			Records on cancers other than head and neck region
310	PMID: 1648704			The records not having RNA-Seq data
311	PMID: 1992444			Records on cancers other than head and neck region
312	PMID: 1846599			The records not having RNA-Seq data
313	PMID: 1846598			The records not having RNA-Seq data
314	PMID: 1668673			Records on cancers other than head and neck region
315	PMID: 1976638			The records not having RNA-Seq data
316	PMID: 2164047			Records on cancers other than head and neck region
317	PMID: 1968061			The records not having RNA-Seq data
318	PMID: 2464747			The records not having RNA-Seq data
319	PMID: 2842362			Records on cancers other than head and neck region
320	PMID: 3290897			Records on cancers other than head and neck region
321	PMID: 2840564			The records not having RNA-Seq data
322	PMID: 3485540			Records on cancers other than head and neck region
323	PMID: 6610687			The records not having RNA-Seq data
324	PMID: 28031050			The records not having RNA-Seq data
325	PMID: 28007026			The records not having RNA-Seq data
326	PMID: 28007028			The records not having RNA-Seq data
327	PMID: 27993131			The records not having RNA-Seq data
328	PMID: 27955638			The records not having RNA-Seq data
329	PMID: 27919278			The records not having RNA-Seq data
330	PMID: 28230029			The records not having RNA-Seq data
331	PMID: 28230030			The records not having RNA-Seq data
332	PMID: 28230025			The records not having RNA-Seq data
333	PMID: 27758080			The records not having RNA-Seq data
334	PMID: 27774777			The records having RNA-Seq data but were not analyzed for identifying alternate splicing
335	PMID: 27933111			The records not having RNA-Seq data
336	PMID: 27887636			The records not having RNA-Seq data
337	PMID: 27884140			The records not having RNA-Seq data
338	PMID: 27884164			The records not having RNA-Seq data
339	PMID: 27895703			The records not having RNA-Seq data
340	PMID: 27871294			The records not having RNA-Seq data
341	PMID: 27852284			The records not having RNA-Seq data
342	PMID: 27846913			The records not having RNA-Seq data
343	PMID: 27833652			The records on viruses
344	PMID: 27560546			The records not having RNA-Seq data
345	PMID: 27726294			The records not having RNA-Seq data
346	PMID: 27793200			The records not having RNA-Seq data
347	PMID: 27756261			The records not having RNA-Seq data
348	PMID: 27737648			The records not having RNA-Seq data
349	PMID: 27733208			The records not having RNA-Seq data
350	PMID: 27729091			The records not having RNA-Seq data
351	PMID: 27716349			The records not having RNA-Seq data
352	PMID: 28485332			The records not having RNA-Seq data
353	PMID: 28485335			The records not having RNA-Seq data
354	PMID: 28485336			The records not having RNA-Seq data
355	PMID: 28485337			The records not having RNA-Seq data
356	PMID: 27669306			The records not having RNA-Seq data
357	PMID: 27650585			The records not having RNA-Seq data
358	PMID: 27721252			The records not having RNA-Seq data
359	PMID: 27721259			The records not having RNA-Seq data
360	PMID: 27669890			The records not having RNA-Seq data
361	PMID: 27671196			The records not having RNA-Seq data
362	PMID: 27663357			The records not having RNA-Seq data
363	PMID: 27654955			The records not having RNA-Seq data
364	PMID: 27647315			The records not having RNA-Seq data
365	PMID: 27604995			The records not having RNA-Seq data
366	PMID: 27599611			The records having RNA-Seq data but were not analyzed for identifying alternate splicing
367	PMID: 27598202			The records not having RNA-Seq data
368	PMID: 27311700			The records not having RNA-Seq data
369	PMID: 27586393			The records not having RNA-Seq data
370	PMID: 27586641			The records not having RNA-Seq data
371	PMID: 27582255			The records not having RNA-Seq data
372	PMID: 27577729			The records not having RNA-Seq data
373	PMID: 27565887			The records not having RNA-Seq data
374	PMID: 27559359			The records on viruses
375	PMID: 27558690			The records not having RNA-Seq data
376	PMID: 27549330			The records not having RNA-Seq data
377	PMID: 27542718			The records not having RNA-Seq data
378	PMID: 27527073			The records not having RNA-Seq data
379	PMID: 27515039			The records not having RNA-Seq data
380	PMID: 27507261			The records not having RNA-Seq data
381	PMID: 27487932			The records not having RNA-Seq data
382	PMID: 27480165			The records not having RNA-Seq data
383	PMID: 27485544			The records not having RNA-Seq data
384	PMID: 27527216			Non relevant review
385	PMID: 27228557			The records not having RNA-Seq data
386	PMID: 27567956			The records not having RNA-Seq data
387	PMID: 27473433			The records not having RNA-Seq data
388	PMID: 27465596			The records not having RNA-Seq data
389	PMID: 27457382			The records not having RNA-Seq data
390	PMID: 27455841			The records not having RNA-Seq data
391	PMID: 27460585			The records not having RNA-Seq data
392	PMID: 27431799			The records not having RNA-Seq data
393	PMID: 27421772			The records not having RNA-Seq data
394	PMID: 27422630			The records not having RNA-Seq data
395	PMID: 27411683			The records not having RNA-Seq data
396	PMID: 27412115			The records not having RNA-Seq data
397	PMID: 27411387			The records not having RNA-Seq data
398	PMID: 27406036			The records not having RNA-Seq data
399	PMID: 27400785			The records not having RNA-Seq data
400	PMID: 27391030			The records not having RNA-Seq data
401	PMID: 27391309			The records not having RNA-Seq data
402	PMID: 27387955			The records not having RNA-Seq data
403	PMID: 28054520			The records not having RNA-Seq data
404	PMID: 28054528			The records not having RNA-Seq data
405	PMID: 28054529			The records not having RNA-Seq data
406	PMID: 27648084			The records not having RNA-Seq data
407	PMID: 27399917			The records not having RNA-Seq data
408	PMID: 27167827			The records not having RNA-Seq data
409	PMID: 27109697			The records not having RNA-Seq data
410	PMID: 27357728			The records not having RNA-Seq data
411	PMID: 27297407			The records not having RNA-Seq data
412	PMID: 27296171			The records on viruses
413	PMID: 26880659			The records not having RNA-Seq data
414	PMID: 26922862			The records not having RNA-Seq data
415	PMID: 27247555			The records not having RNA-Seq data
416	PMID: 27229476			The records not having RNA-Seq data
417	PMID: 27146632			The records not having RNA-Seq data
418	PMID: 27148398			The records on viruses
419	PMID: 26817420			The records not having RNA-Seq data
420	PMID: 26918517			The records not having RNA-Seq data
421	PMID: 27237319			The records not having RNA-Seq data
422	PMID: 27159678			The records not having RNA-Seq data
423	PMID: 27123042			The records on viruses
424	PMID: 27117713			The records not having RNA-Seq data
425	PMID: 27094927			The records not having RNA-Seq data
426	PMID: 27085492			The records not having RNA-Seq data
427	PMID: 27061083			The records not having RNA-Seq data
428	PMID: 27056488			The records not having RNA-Seq data
429	PMID: 27056547			The records not having RNA-Seq data
430	PMID: 27039294			The records not having RNA-Seq data
431	PMID: 28071620			The records not having RNA-Seq data
432	PMID: 28071622			The records not having RNA-Seq data
433	PMID: 27461591			Non relevant review
434	PMID: 27461592			The records not having RNA-Seq data
435	PMID: 27461593			Non relevant review
436	PMID: 27461598			Non relevant review
437	PMID: 27461611			The records not having RNA-Seq data
438	PMID: 27461623			The records not having RNA-Seq data
439	PMID: 27461633			The records not having RNA-Seq data
440	PMID: 27461660			The records not having RNA-Seq data
441	PMID: 27461669			The records not having RNA-Seq data
442	PMID: 27461673			The records not having RNA-Seq data
443	PMID: 27461677			The records not having RNA-Seq data
444	PMID: 27461683			The records not having RNA-Seq data
445	PMID: 27461703			The records not having RNA-Seq data
446	PMID: 27043631			Non relevant review
447	PMID: 27012522			The records not having RNA-Seq data
448	PMID: 27012679			The records not having RNA-Seq data
449	PMID: 27001663			The records not having RNA-Seq data
450	PMID: 27000157			The records not having RNA-Seq data
451	PMID: 26995190			The records not having RNA-Seq data
452	PMID: 26993269			The records not having RNA-Seq data
453	PMID: 26975503			The records not having RNA-Seq data
454	PMID: 26951044			The records not having RNA-Seq data
455	PMID: 26951089			The records not having RNA-Seq data
456	PMID: 26940728			The records not having RNA-Seq data
457	PMID: 26940066			The records not having RNA-Seq data
458	PMID: 26679292			The records not having RNA-Seq data
459	PMID: 26798989			The records not having RNA-Seq data
460	PMID: 26818916			The records not having RNA-Seq data
461	PMID: 26927178			The records not having RNA-Seq data
462	PMID: 26926144			The records not having RNA-Seq data
463	PMID: 26922239			The records not having RNA-Seq data
464	PMID: 26906330			The records not having RNA-Seq data
465	PMID: 26892607			The records not having RNA-Seq data
466	PMID: 26892430			The records not having RNA-Seq data
467	PMID: 26884234			The records not having RNA-Seq data
468	PMID: 26884055			The records not having RNA-Seq data
469	PMID: 26879049			The records not having RNA-Seq data
470	PMID: 26858129			The records not having RNA-Seq data
471	PMID: 26711175			The records not having RNA-Seq data
472	PMID: 26907349			Non relevant review
473	PMID: 26822763			The records not having RNA-Seq data
474	PMID: 26817597			The records not having RNA-Seq data
475	PMID: 26812901			The records not having RNA-Seq data
476	PMID: 26795575			The records having RNA-Seq data but were not analyzed for identifying alternate splicing
477	PMID: 26795730			The records not having RNA-Seq data
478	PMID: 26792072			The records not having RNA-Seq data
479	PMID: 26769084			The records not having RNA-Seq data
480	PMID: 26768732			The records not having RNA-Seq data
481	PMID: 26754630			The records not having RNA-Seq data
482	PMID: 26738743			The records not having RNA-Seq data
483	PMID: 26739148			The records not having RNA-Seq data
484	PMID: 26728009			The records not having RNA-Seq data
485	PMID: 26742076			The records not having RNA-Seq data
486	PMID: 26751478			The records not having RNA-Seq data
487	PMID: 27698909			The records not having RNA-Seq data
488	PMID: 27877215			The records not having RNA-Seq data
489	PMID: 27877233			The records not having RNA-Seq data
490	PMID: 27994655			The records not having RNA-Seq data
491	PMID: 27994675			The records not having RNA-Seq data
492	PMID: 27920556			The records not having RNA-Seq data
493	PMID: 27826202			The records not having RNA-Seq data
494	PMID: 27843328			The records not having RNA-Seq data
495	PMID: 27853378			The records not having RNA-Seq data
496	PMID: 27895493			The records not having RNA-Seq data
497	PMID: 27822060			The records not having RNA-Seq data
498	PMID: 27822066			The records not having RNA-Seq data
499	PMID: 27785067			The records not having RNA-Seq data
500	PMID: 27785076			The records not having RNA-Seq data
501	PMID: 27695345			The records not having RNA-Seq data
502	PMID: 27729804			The records not having RNA-Seq data
503	PMID: 27574453			The records not having RNA-Seq data
504	PMID: 27536142			The records not having RNA-Seq data
505	PMID: 27471552			The records not having RNA-Seq data
506	PMID: 27471556			The records not having RNA-Seq data
507	PMID: 27471562			The records not having RNA-Seq data
508	PMID: 27524909			The records not having RNA-Seq data
509	PMID: 27445495			The records not having RNA-Seq data
510	PMID: 27468239			Records on cancers other than head and neck region
511	PMID: 27390592			The records not having RNA-Seq data
512	PMID: 27390611			The records not having RNA-Seq data
513	PMID: 27072211			The records not having RNA-Seq data
514	PMID: 27072227			The records not having RNA-Seq data
515	PMID: 27072239			The records not having RNA-Seq data
516	PMID: 27072243			The records not having RNA-Seq data
517	PMID: 27072254			The records not having RNA-Seq data
518	PMID: 27366095			The records not having RNA-Seq data
519	PMID: 27350753			The records not having RNA-Seq data
520	PMID: 27162533			The records not having RNA-Seq data
521	PMID: 27162535			The records not having RNA-Seq data
522	PMID: 27313793			The records not having RNA-Seq data
523	PMID: 27326252			The records not having RNA-Seq data
524	PMID: 27330306			The records not having RNA-Seq data
525	PMID: 27146732			The records not having RNA-Seq data
526	PMID: 27146764			The records not having RNA-Seq data
527	PMID: 27146770			The records not having RNA-Seq data
528	PMID: 27274283			The records not having RNA-Seq data
529	PMID: 27274286			The records not having RNA-Seq data
530	PMID: 27284257			The records not having RNA-Seq data
531	PMID: 27143931			Non relevant review
532	PMID: 27217768			The records not having RNA-Seq data
533	PMID: 27217776			The records not having RNA-Seq data
534	PMID: 27143919			The records not having RNA-Seq data
535	PMID: 27143925			The records not having RNA-Seq data
536	PMID: 26918051			The records not having RNA-Seq data
537	PMID: 27053959			The records not having RNA-Seq data
538	PMID: 27076847			The records not having RNA-Seq data
539	PMID: 27076852			The records not having RNA-Seq data
540	PMID: 27076856			The records not having RNA-Seq data
541	PMID: 27110122			The records not having RNA-Seq data
542	PMID: 27099518			The records not having RNA-Seq data
543	PMID: 27051302			The records not having RNA-Seq data
544	PMID: 27042128			The records not having RNA-Seq data
545	PMID: 26985197			The records not having RNA-Seq data
546	PMID: 26985198			The records not having RNA-Seq data
547	PMID: 27051294			The records not having RNA-Seq data
548	PMID: 27051300			The records not having RNA-Seq data
549	PMID: 26918040			The records not having RNA-Seq data
550	PMID: 26929646			The records not having RNA-Seq data
551	PMID: 26869799			The records not having RNA-Seq data
552	PMID: 26714970			The records not having RNA-Seq data
553	PMID: 26701749			The records not having RNA-Seq data
554	PMID: 26694863			The records not having RNA-Seq data
555	PMID: 26690371			The records not having RNA-Seq data
556	PMID: 26690818			The records not having RNA-Seq data
557	PMID: 26675171			The records on viruses
558	PMID: 26675209			The records not having RNA-Seq data
559	PMID: 26672675			The records not having RNA-Seq data
560	PMID: 26637471			The records not having RNA-Seq data
561	PMID: 26634247			The records not having RNA-Seq data
562	PMID: 26728682			The records not having RNA-Seq data
563	PMID: 26362844			The records not having RNA-Seq data
564	PMID: 26471244			The records not having RNA-Seq data
565	PMID: 26692526			The records not having RNA-Seq data
566	PMID: 26506389			Non relevant review
567	PMID: 26561835			The records not having RNA-Seq data
568	PMID: 26569309			The records not having RNA-Seq data
569	PMID: 26690219			The records not having RNA-Seq data
570	PMID: 26690220			The records not having RNA-Seq data
571	PMID: 26606926			The records not having RNA-Seq data
572	PMID: 26603423			The records not having RNA-Seq data
573	PMID: 26573573			The records not having RNA-Seq data
574	PMID: 26555193			The records not having RNA-Seq data
575	PMID: 26552376			The records not having RNA-Seq data
576	PMID: 26553007			The records not having RNA-Seq data
577	PMID: 26557156			The records not having RNA-Seq data
578	PMID: 26545583			The records not having RNA-Seq data
579	PMID: 26545861			The records not having RNA-Seq data
580	PMID: 26545871			The records not having RNA-Seq data
581	PMID: 26816501			The records not having RNA-Seq data
582	PMID: 26310711			The records not having RNA-Seq data
583	PMID: 26470851			The records not having RNA-Seq data
584	PMID: 26520570			The records not having RNA-Seq data
585	PMID: 26506820			The records not having RNA-Seq data
586	PMID: 26503504			The records not having RNA-Seq data
587	PMID: 26503699			The records not having RNA-Seq data
588	PMID: 26482899			The records not having RNA-Seq data
589	PMID: 26483189			The records not having RNA-Seq data
590	PMID: 26475344			The records not having RNA-Seq data
591	PMID: 26471496			The records not having RNA-Seq data
592	PMID: 26472233			The records not having RNA-Seq data
593	PMID: 26471020			The records not having RNA-Seq data
594	PMID: 26472042			The records having RNA-Seq data but were not analyzed for identifying alternate splicing
595	PMID: 26459302			Non relevant review
596	PMID: 26462255			The records not having RNA-Seq data
597	PMID: 26960459			The records not having RNA-Seq data
598	PMID: 26960495			The records not having RNA-Seq data
599	PMID: 26960498			The records not having RNA-Seq data
600	PMID: 26960500			The records not having RNA-Seq data
601	PMID: 26960501			The records not having RNA-Seq data
602	PMID: 26881508			The records not having RNA-Seq data
603	PMID: 26881516			The records not having RNA-Seq data
604	PMID: 26881537			The records not having RNA-Seq data
605	PMID: 26881641			The records not having RNA-Seq data
606	PMID: 26881631			The records not having RNA-Seq data
607	PMID: 26881601			The records not having RNA-Seq data
608	PMID: 26881633			The records not having RNA-Seq data
609	PMID: 26881639			The records not having RNA-Seq data
610	PMID: 26506882			The records not having RNA-Seq data
611	PMID: 26506877			The records not having RNA-Seq data
612	PMID: 26506872			The records not having RNA-Seq data
613	PMID: 26506868			The records not having RNA-Seq data
614	PMID: 26506880			The records not having RNA-Seq data
615	PMID: 26506874			The records not having RNA-Seq data
616	PMID: 26506881			The records not having RNA-Seq data
617	PMID: 26506866			The records not having RNA-Seq data
618	PMID: 26506867			The records not having RNA-Seq data
619	PMID: 26194878			The records not having RNA-Seq data
620	PMID: 26250857			The records not having RNA-Seq data
621	PMID: 26419914			The records not having RNA-Seq data
622	PMID: 26420726			The records not having RNA-Seq data
623	PMID: 26407897			The records not having RNA-Seq data
624	PMID: 26404490			The records not having RNA-Seq data
625	PMID: 26388702			The records not having RNA-Seq data
626	PMID: 26377685			The records not having RNA-Seq data
627	PMID: 26381239			The records not having RNA-Seq data
628	PMID: 26369827			The records not having RNA-Seq data
629	PMID: 26361755			The records not having RNA-Seq data
630	PMID: 26353754			The records not having RNA-Seq data
631	PMID: 26082292			The records not having RNA-Seq data
632	PMID: 26445606			The records not having RNA-Seq data
633	PMID: 26036622			The records not having RNA-Seq data
634	PMID: 26120967			The records not having RNA-Seq data
635	PMID: 26343729			Non relevant review
636	PMID: 26404378			The records not having RNA-Seq data
637	PMID: 26311588			The records not having RNA-Seq data
638	PMID: 26307051			The records not having RNA-Seq data
639	PMID: 26302761			The records not having RNA-Seq data
640	PMID: 26300994			The records not having RNA-Seq data
641	PMID: 26292957			The records not having RNA-Seq data
642	PMID: 26275421			The records not having RNA-Seq data
643	PMID: 26264052			The records not having RNA-Seq data
644	PMID: 26259597			The records not having RNA-Seq data
645	PMID: 26253488			The records not having RNA-Seq data
646	PMID: 25991077			The records not having RNA-Seq data
647	PMID: 26228921			The records not having RNA-Seq data
648	PMID: 26223311			The records not having RNA-Seq data
649	PMID: 26225121			The records not having RNA-Seq data
650	PMID: 26215037			The records not having RNA-Seq data
651	PMID: 26205886			The records not having RNA-Seq data
652	PMID: 26179387			The records not having RNA-Seq data
653	PMID: 26163015			The records not having RNA-Seq data
654	PMID: 26905147			The records not having RNA-Seq data
655	PMID: 26905153			The records not having RNA-Seq data
656	PMID: 26458654			The records not having RNA-Seq data
657	PMID: 26458663			The records not having RNA-Seq data
658	PMID: 26458645			The records not having RNA-Seq data
659	PMID: 26458715			The records not having RNA-Seq data
660	PMID: 26458630			The records not having RNA-Seq data
661	PMID: 26458649			The records not having RNA-Seq data
662	PMID: 25924914			The records not having RNA-Seq data
663	PMID: 25919147			Non relevant review
664	PMID: 26122711			The records not having RNA-Seq data
665	PMID: 26112272			The records not having RNA-Seq data
666	PMID: 26106283			The records not having RNA-Seq data
667	PMID: 26067059			The records not having RNA-Seq data
668	PMID: 26063113			The records not having RNA-Seq data
669	PMID: 26055874			The records not having RNA-Seq data
670	PMID: 25781202			The records not having RNA-Seq data
671	PMID: 25836654			Non relevant review
672	PMID: 26029027			The records not having RNA-Seq data
673	PMID: 26024915			The records not having RNA-Seq data
674	PMID: 26019688			The records not having RNA-Seq data
675	PMID: 26003145			The records not having RNA-Seq data
676	PMID: 26058563			The records not having RNA-Seq data
677	PMID: 25990935			The records not having RNA-Seq data
678	PMID: 27119105			The records not having RNA-Seq data
679	PMID: 25976920			The records not having RNA-Seq data
680	PMID: 25971451			The records not having RNA-Seq data
681	PMID: 26058679			The records not having RNA-Seq data
682	PMID: 25956553			The records not having RNA-Seq data
683	PMID: 25958199			The records not having RNA-Seq data
684	PMID: 25943747			The records not having RNA-Seq data
685	PMID: 25935541			The records not having RNA-Seq data
686	PMID: 26207112			The records not having RNA-Seq data
687	PMID: 25619980			The records not having RNA-Seq data
688	PMID: 25644496			The records not having RNA-Seq data
689	PMID: 25929687			The records not having RNA-Seq data
690	PMID: 25925041			The records not having RNA-Seq data
691	PMID: 25924850			The records not having RNA-Seq data
692	PMID: 25927572			The records not having RNA-Seq data
693	PMID: 25903652			The records not having RNA-Seq data
694	PMID: 25896830			The records not having RNA-Seq data
695	PMID: 25908938			The records not having RNA-Seq data
696	PMID: 25881159			The records not having RNA-Seq data
697	PMID: 25889801			The records not having RNA-Seq data
698	PMID: 25885444			The records not having RNA-Seq data
699	PMID: 25963410			The records not having RNA-Seq data
700	PMID: 25889482			The records not having RNA-Seq data
701	PMID: 26853418			Non relevant review
702	PMID: 26148583			The records not having RNA-Seq data
703	PMID: 26148585			The records not having RNA-Seq data
704	PMID: 26148586			The records not having RNA-Seq data
705	PMID: 26148622			The records not having RNA-Seq data
706	PMID: 25926078			The records not having RNA-Seq data
707	PMID: 25619559			The records not having RNA-Seq data
708	PMID: 25644715			The records not having RNA-Seq data
709	PMID: 25893634			The records not having RNA-Seq data
710	PMID: 25885343			The records not having RNA-Seq data
711	PMID: 25889937			The records not having RNA-Seq data
712	PMID: 25885109			The records not having RNA-Seq data
713	PMID: 25889705			The records not having RNA-Seq data
714	PMID: 25868613			The records not having RNA-Seq data
715	PMID: 25962816			The records not having RNA-Seq data
716	PMID: 25962737			The records not having RNA-Seq data
717	PMID: 26034496			The records not having RNA-Seq data
718	PMID: 25810010			The records not having RNA-Seq data
719	PMID: 25810697			The records not having RNA-Seq data
720	PMID: 25810702			The records not having RNA-Seq data
721	PMID: 25734659			Non relevant review
722	PMID: 25890009			The records not having RNA-Seq data
723	PMID: 25880247			The records not having RNA-Seq data
724	PMID: 25849024			The records not having RNA-Seq data
725	PMID: 25705250			The records on viruses
726	PMID: 25889704			The records not having RNA-Seq data
727	PMID: 25880731			The records not having RNA-Seq data
728	PMID: 25885366			The records not having RNA-Seq data
729	PMID: 25645517			The records not having RNA-Seq data
730	PMID: 25492592			The records not having RNA-Seq data
731	PMID: 25622525			The records not having RNA-Seq data
732	PMID: 25612635			The records not having RNA-Seq data
733	PMID: 25595218			The records not having RNA-Seq data
734	PMID: 25679310			The records not having RNA-Seq data
735	PMID: 25582731			The records not having RNA-Seq data
736	PMID: 25573091			The records not having RNA-Seq data
737	PMID: 25566697			The records not having RNA-Seq data
738	PMID: 25566789			The records not having RNA-Seq data
739	PMID: 26837973			The records not having RNA-Seq data
740	PMID: 26837976			The records not having RNA-Seq data
741	PMID: 26837977			The records not having RNA-Seq data
742	PMID: 26837979			The records not having RNA-Seq data
743	PMID: 26837983			The records not having RNA-Seq data
744	PMID: 26837985			The records not having RNA-Seq data
745	PMID: 26535066			The records not having RNA-Seq data
746	PMID: 26535067			The records not having RNA-Seq data
747	PMID: 26640587			The records not having RNA-Seq data
748	PMID: 26604795			The records not having RNA-Seq data
749	PMID: 26604792			The records not having RNA-Seq data
750	PMID: 26635481			The records not having RNA-Seq data
751	PMID: 26604781			The records not having RNA-Seq data
752	PMID: 26504400			The records not having RNA-Seq data
753	PMID: 26457244			The records not having RNA-Seq data
754	PMID: 26396530			The records not having RNA-Seq data
755	PMID: 26284140			The records not having RNA-Seq data
756	PMID: 26346890			The records not having RNA-Seq data
757	PMID: 26170698			The records not having RNA-Seq data
758	PMID: 26109869			The records not having RNA-Seq data
759	PMID: 26089682			The records not having RNA-Seq data
760	PMID: 26082647			The records not having RNA-Seq data
761	PMID: 26000040			The records not having RNA-Seq data
762	PMID: 25879331			The records not having RNA-Seq data
763	PMID: 25879333			The records not having RNA-Seq data
764	PMID: 25879341			The records not having RNA-Seq data
765	PMID: 25879348			The records not having RNA-Seq data
766	PMID: 25879352			The records not having RNA-Seq data
767	PMID: 25879353			The records not having RNA-Seq data
768	PMID: 25879359			The records not having RNA-Seq data
769	PMID: 25879362			The records not having RNA-Seq data
770	PMID: 25999732			The records not having RNA-Seq data
771	PMID: 25767599			The records not having RNA-Seq data
772	PMID: 25767602			The records not having RNA-Seq data
773	PMID: 25653721			The records not having RNA-Seq data
774	PMID: 25553093			The records not having RNA-Seq data
775	PMID: 25759589			The records not having RNA-Seq data
776	PMID: 25338734			The records not having RNA-Seq data
777	PMID: 25678800			The records not having RNA-Seq data
778	PMID: 25622907			The records not having RNA-Seq data
779	PMID: 25355701			The records not having RNA-Seq data
780	PMID: 25670907			The records not having RNA-Seq data
781	PMID: 25551195			The records not having RNA-Seq data
782	PMID: 25544371			The records not having RNA-Seq data
783	PMID: 25544268			The records not having RNA-Seq data
784	PMID: 25685059			The records not having RNA-Seq data
785	PMID: 25527207			The records not having RNA-Seq data
786	PMID: 25539663			The records not having RNA-Seq data
787	PMID: 25515630			The records on viruses
788	PMID: 25519023			The records not having RNA-Seq data
789	PMID: 25495785			The records not having RNA-Seq data
790	PMID: 25477058			The records not having RNA-Seq data
791	PMID: 25500088			The records not having RNA-Seq data
792	PMID: 25526252			The records not having RNA-Seq data
793	PMID: 25081631			The records not having RNA-Seq data
794	PMID: 25297925			The records not having RNA-Seq data
795	PMID: 25418193			The records on viruses
796	PMID: 25418194			The records not having RNA-Seq data
797	PMID: 25435845			The records not having RNA-Seq data
798	PMID: 25432818			The records not having RNA-Seq data
799	PMID: 25479896			The records not having RNA-Seq data
800	PMID: 25424191			The records not having RNA-Seq data
801	PMID: 25424420			The records not having RNA-Seq data
802	PMID: 25427424			The records not having RNA-Seq data
803	PMID: 25421331			The records not having RNA-Seq data
804	PMID: 25413127			The records not having RNA-Seq data
805	PMID: 25407100			The records not having RNA-Seq data
806	PMID: 25866477			The records not having RNA-Seq data
807	PMID: 25407966			The records not having RNA-Seq data
808	PMID: 25403714			The records not having RNA-Seq data
809	PMID: 25376591			The records not having RNA-Seq data
810	PMID: 25366703			The records not having RNA-Seq data
811	PMID: 25362970			The records not having RNA-Seq data
812	PMID: 25450269			The records not having RNA-Seq data
813	PMID: 25450267			The records not having RNA-Seq data
814	PMID: 25223912			Non relevant review
815	PMID: 25367334			The records not having RNA-Seq data
816	PMID: 25367335			Non relevant review
817	PMID: 25348872			The records not having RNA-Seq data
818	PMID: 25351202			The records not having RNA-Seq data
819	PMID: 25338638			The records not having RNA-Seq data
820	PMID: 25317078			The records not having RNA-Seq data
821	PMID: 25389449			The records not having RNA-Seq data
822	PMID: 25045041			The records not having RNA-Seq data
823	PMID: 25579526			The records not having RNA-Seq data
824	PMID: 25579527			The records not having RNA-Seq data
825	PMID: 25579529			The records not having RNA-Seq data
826	PMID: 25579548			The records not having RNA-Seq data
827	PMID: 25379016			The records not having RNA-Seq data
828	PMID: 25011457			Non relevant review
829	PMID: 25260646			The records not having RNA-Seq data
830	PMID: 25245141			The records not having RNA-Seq data
831	PMID: 25245041			The records not having RNA-Seq data
832	PMID: 25233933			The records not having RNA-Seq data
833	PMID: 25189623			The records not having RNA-Seq data
834	PMID: 25190181			The records not having RNA-Seq data
835	PMID: 25182342			The records not having RNA-Seq data
836	PMID: 25256828			Non relevant review
837	PMID: 25226287			Non relevant review
838	PMID: 25177236			The records not having RNA-Seq data
839	PMID: 25197261			The records not having RNA-Seq data
840	PMID: 25145705			The records not having RNA-Seq data
841	PMID: 25127876			The records not having RNA-Seq data
842	PMID: 25115815			The records not having RNA-Seq data
843	PMID: 25109220			The records not having RNA-Seq data
844	PMID: 25098939			The records not having RNA-Seq data
845	PMID: 25098679			The records not having RNA-Seq data
846	PMID: 24890018			The records not having RNA-Seq data
847	PMID: 25171890			The records not having RNA-Seq data
848	PMID: 25171891			The records not having RNA-Seq data
849	PMID: 25171892			The records not having RNA-Seq data
850	PMID: 25096544			The records not having RNA-Seq data
851	PMID: 25042135			The records not having RNA-Seq data
852	PMID: 25027948			The records not having RNA-Seq data
853	PMID: 25027955			The records not having RNA-Seq data
854	PMID: 25011678			The records not having RNA-Seq data
855	PMID: 25313726			Non relevant review
856	PMID: 25313727			Non relevant review
857	PMID: 25313730			Non relevant review
858	PMID: 25494107			The records not having RNA-Seq data
859	PMID: 25494110			The records not having RNA-Seq data
860	PMID: 25494111			The records not having RNA-Seq data
861	PMID: 24815674			The records not having RNA-Seq data
862	PMID: 24874644			The records not having RNA-Seq data
863	PMID: 24973959			The records not having RNA-Seq data
864	PMID: 24969046			The records not having RNA-Seq data
865	PMID: 24961145			The records not having RNA-Seq data
866	PMID: 24931737			The records not having RNA-Seq data
867	PMID: 24928361			The records not having RNA-Seq data
868	PMID: 24923533			The records not having RNA-Seq data
869	PMID: 24928086			The records not having RNA-Seq data
870	PMID: 24919963			The records not having RNA-Seq data
871	PMID: 24912482			The records not having RNA-Seq data
872	PMID: 24893577			The records not having RNA-Seq data
873	PMID: 24862538			The records not having RNA-Seq data
874	PMID: 24703594			The records not having RNA-Seq data
875	PMID: 24698959			The records not having RNA-Seq data
876	PMID: 24884513			The records not having RNA-Seq data
877	PMID: 24885222			The records not having RNA-Seq data
878	PMID: 24885829			The records not having RNA-Seq data
879	PMID: 24886439			The records not having RNA-Seq data
880	PMID: 24886209			The records not having RNA-Seq data
881	PMID: 24885469			The records not having RNA-Seq data
882	PMID: 24885244			The records not having RNA-Seq data
883	PMID: 24884612			The records not having RNA-Seq data
884	PMID: 24884880			The records not having RNA-Seq data
885	PMID: 24887090			The records not having RNA-Seq data
886	PMID: 24885002			The records not having RNA-Seq data
887	PMID: 24886308			The records not having RNA-Seq data
888	PMID: 24165896			The records not having RNA-Seq data
889	PMID: 22505597			The records not having RNA-Seq data
890	PMID: 25609190			The records not having RNA-Seq data
891	PMID: 25608735			The records not having RNA-Seq data
892	PMID: 24767405			The records not having RNA-Seq data
893	PMID: 24767179			The records not having RNA-Seq data
894	PMID: 24766948			The records not having RNA-Seq data
895	PMID: 24761979			The records not having RNA-Seq data
896	PMID: 24758564			The records not having RNA-Seq data
897	PMID: 24751144			The records not having RNA-Seq data
898	PMID: 24750665			The records not having RNA-Seq data
899	PMID: 24742019			The records not having RNA-Seq data
900	PMID: 24725381			The records not having RNA-Seq data
901	PMID: 24725344			The records not having RNA-Seq data
902	PMID: 24708550			The records not having RNA-Seq data
903	PMID: 24415717			The records not having RNA-Seq data
904	PMID: 24497500			The records not having RNA-Seq data
905	PMID: 24515895			The records not having RNA-Seq data
906	PMID: 24510528			The records not having RNA-Seq data
907	PMID: 25022371			The records not having RNA-Seq data
908	PMID: 25022373			The records not having RNA-Seq data
909	PMID: 25022375			The records not having RNA-Seq data
910	PMID: 25022379			The records not having RNA-Seq data
911	PMID: 25022400			The records not having RNA-Seq data
912	PMID: 25104184			The records not having RNA-Seq data
913	PMID: 25104185			The records not having RNA-Seq data
914	PMID: 25104187			The records not having RNA-Seq data
915	PMID: 24521534			The records not having RNA-Seq data
916	PMID: 24678902			The records not having RNA-Seq data
917	PMID: 24674015			The records not having RNA-Seq data
918	PMID: 24666435			The records not having RNA-Seq data
919	PMID: 24629046			The records not having RNA-Seq data
920	PMID: 24612587			The records not having RNA-Seq data
921	PMID: 24606633			The records not having RNA-Seq data
922	PMID: 24606961			The records not having RNA-Seq data
923	PMID: 24602316			The records not having RNA-Seq data
924	PMID: 24593279			The records not having RNA-Seq data
925	PMID: 23958058			The records not having RNA-Seq data
926	PMID: 24531055			Non relevant review
927	PMID: 24581393			The records not having RNA-Seq data
928	PMID: 24587773			Non relevant review
929	PMID: 24587778			The records not having RNA-Seq data
930	PMID: 24571531			The records not having RNA-Seq data
931	PMID: 24555575			The records not having RNA-Seq data
932	PMID: 24555657			The records not having RNA-Seq data
933	PMID: 24552293			The records not having RNA-Seq data
934	PMID: 24533569			The records not having RNA-Seq data
935	PMID: 24512755			The records not having RNA-Seq data
936	PMID: 24507476			The records not having RNA-Seq data
937	PMID: 24495306			The records not having RNA-Seq data
938	PMID: 24709421			The records not having RNA-Seq data
939	PMID: 24709424			The records not having RNA-Seq data
940	PMID: 24460780			The records not having RNA-Seq data
941	PMID: 24423415			The records not having RNA-Seq data
942	PMID: 24410905			The records not having RNA-Seq data
943	PMID: 24410957			The records not having RNA-Seq data
944	PMID: 24411006			The records not having RNA-Seq data
945	PMID: 24393418			The records not having RNA-Seq data
946	PMID: 25653540			The records not having RNA-Seq data
947	PMID: 25763326			Non relevant review
948	PMID: 25763315			The records not having RNA-Seq data
949	PMID: 25246801			The records not having RNA-Seq data
950	PMID: 25214794			The records not having RNA-Seq data
951	PMID: 24947091			The records not having RNA-Seq data
952	PMID: 24947100			The records not having RNA-Seq data
953	PMID: 24868167			The records not having RNA-Seq data
954	PMID: 24762487			The records not having RNA-Seq data
955	PMID: 24762505			The records not having RNA-Seq data
956	PMID: 24762506			The records not having RNA-Seq data
957	PMID: 24648744			The records not having RNA-Seq data
958	PMID: 24672248			The records not having RNA-Seq data
959	PMID: 24168112			The records not having RNA-Seq data
960	PMID: 24611017			Non relevant review
961	PMID: 24380387			The records not having RNA-Seq data
962	PMID: 24373621			The records not having RNA-Seq data
963	PMID: 24373220			The records not having RNA-Seq data
964	PMID: 24330540			The records not having RNA-Seq data
965	PMID: 24330498			The records not having RNA-Seq data
966	PMID: 24592140			The records not having RNA-Seq data
967	PMID: 24289313			The records not having RNA-Seq data
968	PMID: 24403253			The records not having RNA-Seq data
969	PMID: 24403269			The records not having RNA-Seq data
970	PMID: 24403272			The records not having RNA-Seq data
971	PMID: 24286495			The records not having RNA-Seq data
972	PMID: 24261884			The records not having RNA-Seq data
973	PMID: 24252126			The records not having RNA-Seq data
974	PMID: 24237861			The records not having RNA-Seq data
975	PMID: 24219818			The records not having RNA-Seq data
976	PMID: 24209638			The records not having RNA-Seq data
977	PMID: 24196030			The records not having RNA-Seq data
978	PMID: 24192080			The records not having RNA-Seq data
979	PMID: 24188789			The records not having RNA-Seq data
980	PMID: 24192223			The records not having RNA-Seq data
981	PMID: 24165756			The records not having RNA-Seq data
982	PMID: 24156782			The records not having RNA-Seq data
983	PMID: 24138931			The records not having RNA-Seq data
984	PMID: 24139288			The records not having RNA-Seq data
985	PMID: 24125432			The records not having RNA-Seq data
986	PMID: 24094078			The records not having RNA-Seq data
987	PMID: 24090107			The records not having RNA-Seq data
988	PMID: 24083351			The records not having RNA-Seq data
989	PMID: 24369206			The records not having RNA-Seq data
990	PMID: 24369209			The records not having RNA-Seq data
991	PMID: 24369216			The records not having RNA-Seq data
992	PMID: 24518700			Non relevant review
993	PMID: 24518701			The records not having RNA-Seq data
994	PMID: 24518704			The records not having RNA-Seq data
995	PMID: 24518705			The records not having RNA-Seq data
996	PMID: 24518706			The records not having RNA-Seq data
997	PMID: 24518707			The records not having RNA-Seq data
998	PMID: 24079363			The records not having RNA-Seq data
999	PMID: 24063540			The records not having RNA-Seq data
1000	PMID: 24044722			The records not having RNA-Seq data
1001	PMID: 24034781			The records not having RNA-Seq data
1002	PMID: 24020432			The records not having RNA-Seq data
1003	PMID: 24006899			The records not having RNA-Seq data
1004	PMID: 24007375			The records not having RNA-Seq data
1005	PMID: 24592119			The records not having RNA-Seq data
1006	PMID: 24592125			The records not having RNA-Seq data
1007	PMID: 24018643			The records not having RNA-Seq data
1008	PMID: 23978128			The records not having RNA-Seq data
1009	PMID: 23962337			The records not having RNA-Seq data
1010	PMID: 23941622			The records not having RNA-Seq data
1011	PMID: 23941693			The records not having RNA-Seq data
1012	PMID: 23938045			The records not having RNA-Seq data
1013	PMID: 23915314			The records not having RNA-Seq data
1014	PMID: 23915735			The records on viruses
1015	PMID: 23908686			The records not having RNA-Seq data
1016	PMID: 23870134			The records not having RNA-Seq data
1017	PMID: 23855804			The records not having RNA-Seq data
1018	PMID: 23829309			The records not having RNA-Seq data
1019	PMID: 23826875			The records not having RNA-Seq data
1020	PMID: 24125971			The records not having RNA-Seq data
1021	PMID: 24126006			The records not having RNA-Seq data
1022	PMID: 23814492			The records not having RNA-Seq data
1023	PMID: 23815869			The records not having RNA-Seq data
1024	PMID: 23815822			The records not having RNA-Seq data
1025	PMID: 23815987			The records not having RNA-Seq data
1026	PMID: 23806065			The records not having RNA-Seq data
1027	PMID: 23803252			The records not having RNA-Seq data
1028	PMID: 23786757			The records not having RNA-Seq data
1029	PMID: 23782497			The records not having RNA-Seq data
1030	PMID: 23782473			The records not having RNA-Seq data
1031	PMID: 23777485			The records not having RNA-Seq data
1032	PMID: 23758795			The records not having RNA-Seq data
1033	PMID: 23758864			The records not having RNA-Seq data
1034	PMID: 23730406			The records not having RNA-Seq data
1035	PMID: 23730414			The records not having RNA-Seq data
1036	PMID: 23730210			The records not having RNA-Seq data
1037	PMID: 24596514			The records not having RNA-Seq data
1038	PMID: 23930212			The records not having RNA-Seq data
1039	PMID: 23721111			The records not having RNA-Seq data
1040	PMID: 23718900			The records not having RNA-Seq data
1041	PMID: 23710609			The records not having RNA-Seq data
1042	PMID: 23710879			The records not having RNA-Seq data
1043	PMID: 23675829			The records not having RNA-Seq data
1044	PMID: 23672519			The records not having RNA-Seq data
1045	PMID: 23663243			The records not having RNA-Seq data
1046	PMID: 23642234			The records not having RNA-Seq data
1047	PMID: 23642182			The records not having RNA-Seq data
1048	PMID: 23633918			The records not having RNA-Seq data
1049	PMID: 23634757			The records not having RNA-Seq data
1050	PMID: 22791311			Non relevant review
1051	PMID: 23631652			The records not having RNA-Seq data
1052	PMID: 23621873			The records not having RNA-Seq data
1053	PMID: 23594504			The records not having RNA-Seq data
1054	PMID: 23587173			The records not having RNA-Seq data
1055	PMID: 23578338			The records not having RNA-Seq data
1056	PMID: 23578324			The records not having RNA-Seq data
1057	PMID: 23552362			The records not having RNA-Seq data
1058	PMID: 23547760			The records not having RNA-Seq data
1059	PMID: 23771366			The records not having RNA-Seq data
1060	PMID: 23771372			The records not having RNA-Seq data
1061	PMID: 23771375			The records not having RNA-Seq data
1062	PMID: 23771382			The records not having RNA-Seq data
1063	PMID: 23771386			The records not having RNA-Seq data
1064	PMID: 23979205			The records not having RNA-Seq data
1065	PMID: 23521779			The records not having RNA-Seq data
1066	PMID: 23514246			The records not having RNA-Seq data
1067	PMID: 23496845			The records not having RNA-Seq data
1068	PMID: 23506259			The records not having RNA-Seq data
1069	PMID: 23497198			The records not having RNA-Seq data
1070	PMID: 23497185			The records not having RNA-Seq data
1071	PMID: 23497031			The records not having RNA-Seq data
1072	PMID: 23497365			The records not having RNA-Seq data
1073	PMID: 23445779			The records not having RNA-Seq data
1074	PMID: 23433435			The records not having RNA-Seq data
1075	PMID: 23409748			The records not having RNA-Seq data
1076	PMID: 23374258			Non relevant review
1077	PMID: 23375119			The records not having RNA-Seq data
1078	PMID: 26909271			Non relevant review
1079	PMID: 23369221			The records not having RNA-Seq data
1080	PMID: 23336282			The records not having RNA-Seq data
1081	PMID: 23331666			The records not having RNA-Seq data
1082	PMID: 23713035			The records not having RNA-Seq data
1083	PMID: 23713038			The records not having RNA-Seq data
1084	PMID: 23713039			The records not having RNA-Seq data
1085	PMID: 24063698			The records not having RNA-Seq data
1086	PMID: 24311943			The records not having RNA-Seq data
1087	PMID: 24155776			The records not having RNA-Seq data
1088	PMID: 24324343			The records not having RNA-Seq data
1089	PMID: 24187501			The records not having RNA-Seq data
1090	PMID: 23986644			The records not having RNA-Seq data
1091	PMID: 23575081			The records not having RNA-Seq data
1092	PMID: 23575086			Non relevant review
1093	PMID: 23575100			The records not having RNA-Seq data
1094	PMID: 23874107			The records not having RNA-Seq data
1095	PMID: 23836993			The records not having RNA-Seq data
1096	PMID: 23788836			The records not having RNA-Seq data
1097	PMID: 23386906			The records not having RNA-Seq data
1098	PMID: 23630424			The records not having RNA-Seq data
1099	PMID: 23378773			The records not having RNA-Seq data
1100	PMID: 22553254			The records not having RNA-Seq data
1101	PMID: 23256610			The records not having RNA-Seq data
1102	PMID: 23245290			The records not having RNA-Seq data
1103	PMID: 23231769			The records not having RNA-Seq data
1104	PMID: 23206972			The records not having RNA-Seq data
1105	PMID: 23198710			The records not having RNA-Seq data
1106	PMID: 23342279			The records not having RNA-Seq data
1107	PMID: 23193977			The records not having RNA-Seq data
1108	PMID: 23176396			The records not having RNA-Seq data
1109	PMID: 23173732			The records not having RNA-Seq data
1110	PMID: 23151022			The records not having RNA-Seq data
1111	PMID: 23226094			The records not having RNA-Seq data
1112	PMID: 23226095			The records not having RNA-Seq data
1113	PMID: 23114230			The records not having RNA-Seq data
1114	PMID: 23113946			The records not having RNA-Seq data
1115	PMID: 23110497			The records not having RNA-Seq data
1116	PMID: 23110587			The records not having RNA-Seq data
1117	PMID: 23107277			The records not having RNA-Seq data
1118	PMID: 23101561			The records not having RNA-Seq data
1119	PMID: 23088283			The records not having RNA-Seq data
1120	PMID: 23083099			The records not having RNA-Seq data
1121	PMID: 23083061			The records not having RNA-Seq data
1122	PMID: 23082988			The records not having RNA-Seq data
1123	PMID: 23031071			The records not having RNA-Seq data
1124	PMID: 23361279			The records not having RNA-Seq data
1125	PMID: 23361280			The records not having RNA-Seq data
1126	PMID: 23361287			The records not having RNA-Seq data
1127	PMID: 23788927			The records not having RNA-Seq data
1128	PMID: 23066440			The records not having RNA-Seq data
1129	PMID: 23342270			The records not having RNA-Seq data
1130	PMID: 23342272			The records not having RNA-Seq data
1131	PMID: 23021083			The records not having RNA-Seq data
1132	PMID: 23009663			The records not having RNA-Seq data
1133	PMID: 22994655			The records not having RNA-Seq data
1134	PMID: 22994622			The records not having RNA-Seq data
1135	PMID: 22989046			The records not having RNA-Seq data
1136	PMID: 22986368			The records not having RNA-Seq data
1137	PMID: 22958729			The records not having RNA-Seq data
1138	PMID: 21498473			The records not having RNA-Seq data
1139	PMID: 22931099			The records not having RNA-Seq data
1140	PMID: 22931894			The records not having RNA-Seq data
1141	PMID: 22931165			The records not having RNA-Seq data
1142	PMID: 22929110			The records not having RNA-Seq data
1143	PMID: 22920673			The records not having RNA-Seq data
1144	PMID: 22920680			The records not having RNA-Seq data
1145	PMID: 22906006			The records not having RNA-Seq data
1146	PMID: 22873792			The records not having RNA-Seq data
1147	PMID: 22937181			The records not having RNA-Seq data
1148	PMID: 22852863			The records not having RNA-Seq data
1149	PMID: 22839099			The records not having RNA-Seq data
1150	PMID: 22809533			The records not having RNA-Seq data
1151	PMID: 22789070			The records not having RNA-Seq data
1152	PMID: 23174719			The records not having RNA-Seq data
1153	PMID: 23238150			The records not having RNA-Seq data
1154	PMID: 22727408			The records not having RNA-Seq data
1155	PMID: 22712549			The records not having RNA-Seq data
1156	PMID: 22708791			The records not having RNA-Seq data
1157	PMID: 22704542			The records not having RNA-Seq data
1158	PMID: 22704532			The records not having RNA-Seq data
1159	PMID: 22691269			The records not having RNA-Seq data
1160	PMID: 22691266			The records not having RNA-Seq data
1161	PMID: 22686297			The records not having RNA-Seq data
1162	PMID: 22672838			The records not having RNA-Seq data
1163	PMID: 22787428			The records not having RNA-Seq data
1164	PMID: 21665877			The records not having RNA-Seq data
1165	PMID: 22646734			The records not having RNA-Seq data
1166	PMID: 22639817			The records not having RNA-Seq data
1167	PMID: 22583829			The records not having RNA-Seq data
1168	PMID: 22578076			The records not having RNA-Seq data
1169	PMID: 22574757			The records not having RNA-Seq data
1170	PMID: 22548841			The records not having RNA-Seq data
1171	PMID: 22500814			The records not having RNA-Seq data
1172	PMID: 22498108			The records not having RNA-Seq data
1173	PMID: 22842371			The records not having RNA-Seq data
1174	PMID: 23107973			The records not having RNA-Seq data
1175	PMID: 23107975			The records not having RNA-Seq data
1176	PMID: 23107976			The records not having RNA-Seq data
1177	PMID: 22449259			The records not having RNA-Seq data
1178	PMID: 22443202			The records not having RNA-Seq data
1179	PMID: 22433671			The records not having RNA-Seq data
1180	PMID: 22429900			The records not having RNA-Seq data
1181	PMID: 21498475			The records not having RNA-Seq data
1182	PMID: 23552555			The records not having RNA-Seq data
1183	PMID: 22376902			The records not having RNA-Seq data
1184	PMID: 22369429			The records not having RNA-Seq data
1185	PMID: 22339894			The records not having RNA-Seq data
1186	PMID: 22336657			The records not having RNA-Seq data
1187	PMID: 22336097			The records not having RNA-Seq data
1188	PMID: 22316341			The records not having RNA-Seq data
1189	PMID: 22316381			The records not having RNA-Seq data
1190	PMID: 22313843			The records not having RNA-Seq data
1191	PMID: 22264292			The records not having RNA-Seq data
1192	PMID: 22233756			The records not having RNA-Seq data
1193	PMID: 22322734			The records not having RNA-Seq data
1194	PMID: 22322736			The records not having RNA-Seq data
1195	PMID: 22322727			The records not having RNA-Seq data
1196	PMID: 22322730			The records not having RNA-Seq data
1197	PMID: 22322731			The records not having RNA-Seq data
1198	PMID: 23226027			The records not having RNA-Seq data
1199	PMID: 23189032			The records not having RNA-Seq data
1200	PMID: 23118544			Non relevant review
1201	PMID: 22842160			The records not having RNA-Seq data
1202	PMID: 22842161			The records not having RNA-Seq data
1203	PMID: 22842162			The records not having RNA-Seq data
1204	PMID: 22842163			The records not having RNA-Seq data
1205	PMID: 22842164			The records not having RNA-Seq data
1206	PMID: 22842166			The records not having RNA-Seq data
1207	PMID: 22842167			The records not having RNA-Seq data
1208	PMID: 22888261			The records not having RNA-Seq data
1209	PMID: 22531512			The records not having RNA-Seq data
1210	PMID: 22531518			The records not having RNA-Seq data
1211	PMID: 26113877	Different head and neck cancer subtypes	MISO
1212	PMID: 28733453	HPV-related oropharyngeal squamous cell carcinoma	MapSplice
1213	PMID: 27197215	Head and neck squamous cell carcinoma	Suppa

## Sheet: PubMed search 19th Sep 2017
S.No	PubMed ID	Tumor type	Software used	Excluded with reason
1	PMID: 28553938			Records on cancers other than head and neck region
2	PMID: 28493890			Records on cancers other than head and neck region
3	PMID: 28223168			Records on cancers other than head and neck region
4	PMID: 28098904			Records on cancers other than head and neck region
5	PMID: 28082404			Records on cancers other than head and neck region
6	PMID: 27621578			The records having RNA-Seq data but were not analyzed for identifying alternate splicing
7	PMID: 27587658			Records on cancers other than head and neck region
8	PMID: 27565572			Records on cancers other than head and neck region
9	PMID: 27432315			Records on cancers other than head and neck region
10	PMID: 27264950			Records on cancers other than head and neck region
11	PMID: 27153587			Records on cancers other than head and neck region
12	PMID: 26901859			The records not having RNA-Seq data
13	PMID: 26875870			Non relevant review
14	PMID: 26845116			Records on cancers other than head and neck region
15	PMID: 26775595			Records on cancers other than head and neck region
16	PMID: 26711644			Records on cancers other than head and neck region
17	PMID: 26646278			Records on cancers other than head and neck region
18	PMID: 26631070			The records having RNA-Seq data but were not analyzed for identifying alternate splicing
19	PMID: 26606055			Records on cancers other than head and neck region
20	PMID: 26554648			Records on cancers other than head and neck region
21	PMID: 26522722			Records on cancers other than head and neck region
22	PMID: 26498364	Oral cancer cells	AltAnalyze software
23	PMID: 26434412			Non relevant review
24	PMID: 26416554			The records not having RNA-Seq data
25	PMID: 26271415			Records on cancers other than head and neck region
26	PMID: 26251276			The records having RNA-Seq data but were not analyzed for identifying alternate splicing
27	PMID: 26238073			Records on cancers other than head and neck region
28	PMID: 26229396			Records on cancers other than head and neck region
29	PMID: 26135620			Records on cancers other than head and neck region
30	PMID: 26073078			Records on cancers other than head and neck region
31	PMID: 25923053			The records not having RNA-Seq data
32	PMID: 25884497			Records on cancers other than head and neck region
33	PMID: 25830670			Records on cancers other than head and neck region
34	PMID: 25671302			Records on cancers other than head and neck region
35	PMID: 25669972			Records on cancers other than head and neck region
36	PMID: 25630972			Records on cancers other than head and neck region
37	PMID: 25592567			Records on cancers other than head and neck region
38	PMID: 25526730			Records on cancers other than head and neck region
39	PMID: 25481564			Records on cancers other than head and neck region
40	PMID: 25424858			Records on cancers other than head and neck region
41	PMID: 25108200			Records on cancers other than head and neck region
42	PMID: 25091051			Records on cancers other than head and neck region
43	PMID: 25079552			Records on cancers other than head and neck region
44	PMID: 25034693			Records on cancers other than head and neck region
45	PMID: 24859531			Records on cancers other than head and neck region
46	PMID: 24675808			The records not having RNA-Seq data
47	PMID: 24646369			Records on cancers other than head and neck region
48	PMID: 24622401			Records on cancers other than head and neck region
49	PMID: 24571613			Records on cancers other than head and neck region
50	PMID: 24563233			The records not having RNA-Seq data
51	PMID: 24428911			The records not having RNA-Seq data
52	PMID: 24257595			The records on viruses
53	PMID: 24158655			The records not having RNA-Seq data
54	PMID: 24141781			The records not having RNA-Seq data
55	PMID: 24077665			The records having RNA-Seq data but were not analyzed for identifying alternate splicing
56	PMID: 24071698			The records published in languages other than English
57	PMID: 23766440			Records on cancers other than head and neck region
58	PMID: 23666063			Records on cancers other than head and neck region
59	PMID: 23566772	Buccal mucosa squamous cell carcinoma (BMSCC)	SpliceMap
60	PMID: 23460839			Records on cancers other than head and neck region
61	PMID: 23444225			Records on cancers other than head and neck region
62	PMID: 23430818			Records on cancers other than head and neck region
63	PMID: 23409773			Records on cancers other than head and neck region
64	PMID: 23314567			Records on cancers other than head and neck region
65	PMID: 23152425			The records not having RNA-Seq data
66	PMID: 23128391			Records on cancers other than head and neck region
67	PMID: 23052255			Records on cancers other than head and neck region
68	PMID: 22975805			Records on cancers other than head and neck region
69	PMID: 22859706			Records on cancers other than head and neck region
70	PMID: 22806361			Records on cancers other than head and neck region
71	PMID: 22799388			The records not having RNA-Seq data
72	PMID: 22591718			Records on cancers other than head and neck region
73	PMID: 22567897			Non relevant review
74	PMID: 22553170			Records on cancers other than head and neck region
75	PMID: 22462637			The records on syndromes
76	PMID: 22416874			The records not having RNA-Seq data
77	PMID: 22238681			Records on cancers other than head and neck region
78	PMID: 22188260			Records on cancers other than head and neck region
79	PMID: 21949640			Records on cancers other than head and neck region
80	PMID: 21622622			Records on cancers other than head and neck region
81	PMID: 21394648			The records not having RNA-Seq data
82	PMID: 21266177			Records on cancers other than head and neck region
83	PMID: 21118496			Records on cancers other than head and neck region
84	PMID: 21041478			Records on cancers other than head and neck region
85	PMID: 20938052			Records on cancers other than head and neck region
86	PMID: 20727893			Records on cancers other than head and neck region
87	PMID: 20691260			Records on cancers other than head and neck region
88	PMID: 20541447			The records on syndromes
89	PMID: 20131318			The records not having RNA-Seq data
90	PMID: 20033787			The records not having RNA-Seq data
91	PMID: 19936049			The records not having RNA-Seq data
92	PMID: 19494365			The records not having RNA-Seq data
93	PMID: 19479822			Records on cancers other than head and neck region
94	PMID: 19467152			The records not having RNA-Seq data
95	PMID: 19447873			Records on cancers other than head and neck region
96	PMID: 19416963			The records not having RNA-Seq data
97	PMID: 19249242			Records on cancers other than head and neck region
98	PMID: 19024105			Records on cancers other than head and neck region
99	PMID: 18927117			Records on cancers other than head and neck region
100	PMID: 18614630			The records on viruses
101	PMID: 18592003			Records on cancers other than head and neck region
102	PMID: 18588873			The records not having RNA-Seq data
103	PMID: 18472110			The records not having RNA-Seq data
104	PMID: 17982254			The records not having RNA-Seq data
105	PMID: 17877643			The records not having RNA-Seq data
106	PMID: 17569023			The records not having RNA-Seq data
107	PMID: 17452979			Records on cancers other than head and neck region
108	PMID: 17334634			The records not having RNA-Seq data
109	PMID: 17266182			Records on cancers other than head and neck region
110	PMID: 17054774			Records on cancers other than head and neck region
111	PMID: 17010196			Records on cancers other than head and neck region
112	PMID: 16995940			The records not having RNA-Seq data
113	PMID: 16878147			The records not having RNA-Seq data
114	PMID: 16861979			Records on cancers other than head and neck region
115	PMID: 16596194			Records on cancers other than head and neck region
116	PMID: 16580182			The records not having RNA-Seq data
117	PMID: 16217771			The records not having RNA-Seq data
118	PMID: 16203624			Records on cancers other than head and neck region
119	PMID: 16177568			The records not having RNA-Seq data
120	PMID: 16122883			Records on cancers other than head and neck region
121	PMID: 16114033			The records not having RNA-Seq data
122	PMID: 15989082			Records on cancers other than head and neck region
123	PMID: 15948147			The records not having RNA-Seq data
124	PMID: 15940269			The records not having RNA-Seq data
125	PMID: 15856293			The records not having RNA-Seq data
126	PMID: 15853821			The records not having RNA-Seq data
127	PMID: 15843153			The records not having RNA-Seq data
128	PMID: 23923566			The records not having RNA-Seq data
129	PMID: 15753364			The records not having RNA-Seq data
130	PMID: 15721309			The records not having RNA-Seq data
131	PMID: 15701831			Records on cancers other than head and neck region
132	PMID: 15625370			Records on cancers other than head and neck region
133	PMID: 15623596			The records not having RNA-Seq data
134	PMID: 15586241			The records not having RNA-Seq data
135	PMID: 15580286			Records on cancers other than head and neck region
136	PMID: 15578720			The records not having RNA-Seq data
137	PMID: 15498584			Records on cancers other than head and neck region
138	PMID: 15484318			Records on cancers other than head and neck region
139	PMID: 15374639			Records on cancers other than head and neck region
140	PMID: 15355897			The records not having RNA-Seq data
141	PMID: 15312379			The records published in languages other than English
142	PMID: 15311055			Records on cancers other than head and neck region
143	PMID: 15254688			Records on cancers other than head and neck region
144	PMID: 15225156			Records on cancers other than head and neck region
145	PMID: 15180946			Records on cancers other than head and neck region
146	PMID: 15077124			The records not having RNA-Seq data
147	PMID: 14981537			Records on cancers other than head and neck region
148	PMID: 14969745			The records not having RNA-Seq data
149	PMID: 14741047			Records on cancers other than head and neck region
150	PMID: 14696120			Records on cancers other than head and neck region
151	PMID: 14674142			The records published in languages other than English
152	PMID: 14639658			Records on cancers other than head and neck region
153	PMID: 14639621			Records on cancers other than head and neck region
154	PMID: 14624010			The records not having RNA-Seq data
155	PMID: 12906858			The records not having RNA-Seq data
156	PMID: 12869302			Records on cancers other than head and neck region
157	PMID: 12821948			The records not having RNA-Seq data
158	PMID: 12817473			The records not having RNA-Seq data
159	PMID: 12815039			The records not having RNA-Seq data
160	PMID: 12810662			The records not having RNA-Seq data
161	PMID: 12747968			The records not having RNA-Seq data
162	PMID: 12734196			The records not having RNA-Seq data
163	PMID: 12669264			The records not having RNA-Seq data
164	PMID: 12566316			Records on cancers other than head and neck region
165	PMID: 12538601			The records not having RNA-Seq data
166	PMID: 12466900			The records not having RNA-Seq data
167	PMID: 12384809			Records on cancers other than head and neck region
168	PMID: 12234988			Records on cancers other than head and neck region
169	PMID: 12203787			The records not having RNA-Seq data
170	PMID: 12183439			Records on cancers other than head and neck region
171	PMID: 12124351			Records on cancers other than head and neck region
172	PMID: 12039098			The records not having RNA-Seq data
173	PMID: 11867619			The records not having RNA-Seq data
174	PMID: 11830556			Records on cancers other than head and neck region
175	PMID: 11812086			The records not having RNA-Seq data
176	PMID: 11776973			The records not having RNA-Seq data
177	PMID: 11774267			Records on cancers other than head and neck region
178	PMID: 11753648			Records on cancers other than head and neck region
179	PMID: 11751411			Records on cancers other than head and neck region
180	PMID: 11703096			The records not having RNA-Seq data
181	PMID: 11675018			Records on cancers other than head and neck region
182	PMID: 11595752			Records on cancers other than head and neck region
183	PMID: 11494132			The records not having RNA-Seq data
184	PMID: 11432748			The records not having RNA-Seq data
185	PMID: 11406281			The records not having RNA-Seq data
186	PMID: 11361006			The records not having RNA-Seq data
187	PMID: 11314039			Records on cancers other than head and neck region
188	PMID: 11313015			Records on cancers other than head and neck region
189	PMID: 11309326			Records on cancers other than head and neck region
190	PMID: 11306511			Records on cancers other than head and neck region
191	PMID: 11301342			The records not having RNA-Seq data
192	PMID: 11298758			Records on cancers other than head and neck region
193	PMID: 11290415			The records not having RNA-Seq data
194	PMID: 11280766			Records on cancers other than head and neck region
195	PMID: 11245980			Records on cancers other than head and neck region
196	PMID: 11168366			The records not having RNA-Seq data
197	PMID: 11161793			The records not having RNA-Seq data
198	PMID: 11135323			Records on cancers other than head and neck region
199	PMID: 11107050			Records on cancers other than head and neck region
200	PMID: 11097842			The records not having RNA-Seq data
201	PMID: 11091205			The records not having RNA-Seq data
202	PMID: 11071864			The records not having RNA-Seq data
203	PMID: 11038365			Records on cancers other than head and neck region
204	PMID: 10998068			The records not having RNA-Seq data
205	PMID: 10980616			Records on cancers other than head and neck region
206	PMID: 10973799			The records not having RNA-Seq data
207	PMID: 10848880			The records not having RNA-Seq data
208	PMID: 10810295			The records not having RNA-Seq data
209	PMID: 10799889			Records on cancers other than head and neck region
210	PMID: 10713061			The records not having RNA-Seq data
211	PMID: 10709093			Records on cancers other than head and neck region
212	PMID: 10679019			The records not having RNA-Seq data
213	PMID: 10632569			The records not having RNA-Seq data
214	PMID: 10611237			The records not having RNA-Seq data
215	PMID: 10597188			Records on cancers other than head and neck region
216	PMID: 10523826			The records not having RNA-Seq data
217	PMID: 10493952			Records on cancers other than head and neck region
218	PMID: 10485918			The records not having RNA-Seq data
219	PMID: 10484779			The records not having RNA-Seq data
220	PMID: 10397166			The records not having RNA-Seq data
221	PMID: 10384152			The records not having RNA-Seq data
222	PMID: 10352938			Records on cancers other than head and neck region
223	PMID: 10082426			The records not having RNA-Seq data
224	PMID: 9777953			Records on cancers other than head and neck region
225	PMID: 9710451			The records not having RNA-Seq data
226	PMID: 9672068			Records on cancers other than head and neck region
227	PMID: 9562620			The records not having RNA-Seq data
228	PMID: 9610356			Records on cancers other than head and neck region
229	PMID: 9607110			The records not having RNA-Seq data
230	PMID: 9528987			The records not having RNA-Seq data
231	PMID: 9528950			The records not having RNA-Seq data
232	PMID: 9528941			The records not having RNA-Seq data
233	PMID: 9510475			Records on cancers other than head and neck region
234	PMID: 9359844			The records not having RNA-Seq data
235	PMID: 9377550			Records on cancers other than head and neck region
236	PMID: 9270016			The records not having RNA-Seq data
237	PMID: 9288629			Records on cancers other than head and neck region
238	PMID: 9180140			The records not having RNA-Seq data
239	PMID: 9153428			Records on cancers other than head and neck region
240	PMID: 9169140			The records not having RNA-Seq data
241	PMID: 9128242			The records not having RNA-Seq data
242	PMID: 9103405			Records on cancers other than head and neck region
243	PMID: 9010321			Records on cancers other than head and neck region
244	PMID: 8891346			The records not having RNA-Seq data
245	PMID: 8781446			The records not having RNA-Seq data
246	PMID: 8661122			The records not having RNA-Seq data
247	PMID: 8652539			Records on cancers other than head and neck region
248	PMID: 8653678			Records on cancers other than head and neck region
249	PMID: 8668345			Records on cancers other than head and neck region
250	PMID: 8631886			Records on cancers other than head and neck region
251	PMID: 8733131			The records not having RNA-Seq data
252	PMID: 8621584			The records not having RNA-Seq data
253	PMID: 8647091			The records not having RNA-Seq data
254	PMID: 8655705			Records on cancers other than head and neck region
255	PMID: 8608966			The records not having RNA-Seq data
256	PMID: 8649806			Records on cancers other than head and neck region
257	PMID: 8579108			Records on cancers other than head and neck region
258	PMID: 8717365			Records on cancers other than head and neck region
259	PMID: 8537388			Records on cancers other than head and neck region
260	PMID: 7565764			The records not having RNA-Seq data
261	PMID: 8576101			The records not having RNA-Seq data
262	PMID: 7545538			Records on cancers other than head and neck region
263	PMID: 7675441			The records not having RNA-Seq data
264	PMID: 7490101			The records not having RNA-Seq data
265	PMID: 8846023			Records on cancers other than head and neck region
266	PMID: 7607211			The records not having RNA-Seq data
267	PMID: 7539775			The records not having RNA-Seq data
268	PMID: 7759551			The records not having RNA-Seq data
269	PMID: 7743517			Records on cancers other than head and neck region
270	PMID: 7750631			The records not having RNA-Seq data
271	PMID: 7720641			The records not having RNA-Seq data
272	PMID: 7615724			The records on viruses
273	PMID: 7536236			The records not having RNA-Seq data
274	PMID: 7882349			The records not having RNA-Seq data
275	PMID: 7721940			The records not having RNA-Seq data
276	PMID: 7737192			The records not having RNA-Seq data
277	PMID: 7758837			The records not having RNA-Seq data
278	PMID: 7815492			The records on viruses
279	PMID: 7961757			The records not having RNA-Seq data
280	PMID: 7927891			Records on cancers other than head and neck region
281	PMID: 8069866			Records on cancers other than head and neck region
282	PMID: 7946273			The records not having RNA-Seq data
283	PMID: 7803853			Records on cancers other than head and neck region
284	PMID: 8033105			Records on cancers other than head and neck region
285	PMID: 7949223			The records not having RNA-Seq data
286	PMID: 8179637			The records not having RNA-Seq data
287	PMID: 7513991			Records on cancers other than head and neck region
288	PMID: 7509777			Records on cancers other than head and neck region
289	PMID: 8299725			The records not having RNA-Seq data
290	PMID: 8162073			The records not having RNA-Seq data
291	PMID: 7517252			Records on cancers other than head and neck region
292	PMID: 8275490			The records not having RNA-Seq data
293	PMID: 7866434			Records on cancers other than head and neck region
294	PMID: 7515025			Records on cancers other than head and neck region
295	PMID: 8413205			The records not having RNA-Seq data
296	PMID: 7505677			The records not having RNA-Seq data
297	PMID: 7690739			The records on viruses
298	PMID: 8325706			The records not having RNA-Seq data
299	PMID: 7685762			The records not having RNA-Seq data
300	PMID: 8481475			The records not having RNA-Seq data
301	PMID: 8384081			Records on cancers other than head and neck region
302	PMID: 7916651			Records on cancers other than head and neck region
303	PMID: 1333130			The records on viruses
304	PMID: 1357452			The records not having RNA-Seq data
305	PMID: 1319059			The records not having RNA-Seq data
306	PMID: 1313931			The records not having RNA-Seq data
307	PMID: 1761559			The records not having RNA-Seq data
308	PMID: 1893964			The records not having RNA-Seq data
309	PMID: 1716516			Records on cancers other than head and neck region
310	PMID: 1648704			The records not having RNA-Seq data
311	PMID: 1992444			Records on cancers other than head and neck region
312	PMID: 1846599			The records not having RNA-Seq data
313	PMID: 1846598			The records not having RNA-Seq data
314	PMID: 1668673			Records on cancers other than head and neck region
315	PMID: 1976638			The records not having RNA-Seq data
316	PMID: 2164047			Records on cancers other than head and neck region
317	PMID: 1968061			The records not having RNA-Seq data
318	PMID: 2464747			The records not having RNA-Seq data
319	PMID: 2842362			Records on cancers other than head and neck region
320	PMID: 3290897			Records on cancers other than head and neck region
321	PMID: 2840564			The records not having RNA-Seq data
322	PMID: 3485540			Records on cancers other than head and neck region
323	PMID: 6610687			The records not having RNA-Seq data

## Sheet: Web of science search 19th Sep 
S.No	PMID	Tumor type	Software used	Excluded with reason
1	PMID: 28031050			The records not having RNA-Seq data
2	PMID: 28007026			The records not having RNA-Seq data
3	PMID: 28007028			The records not having RNA-Seq data
4	PMID: 27993131			The records not having RNA-Seq data
5	PMID: 27955638			The records not having RNA-Seq data
6	PMID: 27919278			The records not having RNA-Seq data
7	PMID: 28230029			The records not having RNA-Seq data
8	PMID: 28230030			The records not having RNA-Seq data
9	PMID: 28230025			The records not having RNA-Seq data
10	PMID: 27758080			The records not having RNA-Seq data
11	PMID: 27774777			The records having RNA-Seq data but were not analyzed for identifying alternate splicing
12	PMID: 27933111			The records not having RNA-Seq data
13	PMID: 27887636			The records not having RNA-Seq data
14	PMID: 27884140			The records not having RNA-Seq data
15	PMID: 27884164			The records not having RNA-Seq data
16	PMID: 27895703			The records not having RNA-Seq data
17	PMID: 27871294			The records not having RNA-Seq data
18	PMID: 27852284			The records not having RNA-Seq data
19	PMID: 27846913			The records not having RNA-Seq data
20	PMID: 27833652			The records on viruses
21	PMID: 27560546			The records not having RNA-Seq data
22	PMID: 27726294			The records not having RNA-Seq data
23	PMID: 27793200			The records not having RNA-Seq data
24	PMID: 27756261			The records not having RNA-Seq data
25	PMID: 27737648			The records not having RNA-Seq data
26	PMID: 27733208			The records not having RNA-Seq data
27	PMID: 27729091			The records not having RNA-Seq data
28	PMID: 27716349			The records not having RNA-Seq data
29	PMID: 28485332			The records not having RNA-Seq data
30	PMID: 28485335			The records not having RNA-Seq data
31	PMID: 28485336			The records not having RNA-Seq data
32	PMID: 28485337			The records not having RNA-Seq data
33	PMID: 27669306			The records not having RNA-Seq data
34	PMID: 27650585			The records not having RNA-Seq data
35	PMID: 27721252			The records not having RNA-Seq data
36	PMID: 27721259			The records not having RNA-Seq data
37	PMID: 27669890			The records not having RNA-Seq data
38	PMID: 27671196			The records not having RNA-Seq data
39	PMID: 27663357			The records not having RNA-Seq data
40	PMID: 27654955			The records not having RNA-Seq data
41	PMID: 27647315			The records not having RNA-Seq data
42	PMID: 27604995			The records not having RNA-Seq data
43	PMID: 27599611			The records having RNA-Seq data but were not analyzed for identifying alternate splicing
44	PMID: 27598202			The records not having RNA-Seq data
45	PMID: 27311700			The records not having RNA-Seq data
46	PMID: 27586393			The records not having RNA-Seq data
47	PMID: 27586641			The records not having RNA-Seq data
48	PMID: 27582255			The records not having RNA-Seq data
49	PMID: 27577729			The records not having RNA-Seq data
50	PMID: 27565887			The records not having RNA-Seq data
51	PMID: 27559359			The records on viruses
52	PMID: 27558690			The records not having RNA-Seq data
53	PMID: 27549330			The records not having RNA-Seq data
54	PMID: 27542718			The records not having RNA-Seq data
55	PMID: 27527073			The records not having RNA-Seq data
56	PMID: 27515039			The records not having RNA-Seq data
57	PMID: 27507261			The records not having RNA-Seq data
58	PMID: 27487932			The records not having RNA-Seq data
59	PMID: 27480165			The records not having RNA-Seq data
60	PMID: 27485544			The records not having RNA-Seq data
61	PMID: 27527216			Non relevant review
62	PMID: 27228557			The records not having RNA-Seq data
63	PMID: 27567956			The records not having RNA-Seq data
64	PMID: 27473433			The records not having RNA-Seq data
65	PMID: 27465596			The records not having RNA-Seq data
66	PMID: 27457382			The records not having RNA-Seq data
67	PMID: 27455841			The records not having RNA-Seq data
68	PMID: 27460585			The records not having RNA-Seq data
69	PMID: 27431799			The records not having RNA-Seq data
70	PMID: 27421772			The records not having RNA-Seq data
71	PMID: 27422630			The records not having RNA-Seq data
72	PMID: 27411683			The records not having RNA-Seq data
73	PMID: 27412115			The records not having RNA-Seq data
74	PMID: 27411387			The records not having RNA-Seq data
75	PMID: 27406036			The records not having RNA-Seq data
76	PMID: 27400785			The records not having RNA-Seq data
77	PMID: 27391030			The records not having RNA-Seq data
78	PMID: 27391309			The records not having RNA-Seq data
79	PMID: 27387955			The records not having RNA-Seq data
80	PMID: 28054520			The records not having RNA-Seq data
81	PMID: 28054528			The records not having RNA-Seq data
82	PMID: 28054529			The records not having RNA-Seq data
83	PMID: 27648084			The records not having RNA-Seq data
84	PMID: 27399917			The records not having RNA-Seq data
85	PMID: 27167827			The records not having RNA-Seq data
86	PMID: 27109697			The records not having RNA-Seq data
87	PMID: 27357728			The records not having RNA-Seq data
88	PMID: 27297407			The records not having RNA-Seq data
89	PMID: 27296171			The records on viruses
90	PMID: 26880659			The records not having RNA-Seq data
91	PMID: 26922862			The records not having RNA-Seq data
92	PMID: 27247555			The records not having RNA-Seq data
93	PMID: 27229476			The records not having RNA-Seq data
94	PMID: 27146632			The records not having RNA-Seq data
95	PMID: 27148398			The records on viruses
96	PMID: 26817420			The records not having RNA-Seq data
97	PMID: 26918517			The records not having RNA-Seq data
98	PMID: 27237319			The records not having RNA-Seq data
99	PMID: 27159678			The records not having RNA-Seq data
100	PMID: 27123042			The records on viruses
101	PMID: 27117713			The records not having RNA-Seq data
102	PMID: 27094927			The records not having RNA-Seq data
103	PMID: 27085492			The records not having RNA-Seq data
104	PMID: 27061083			The records not having RNA-Seq data
105	PMID: 27056488			The records not having RNA-Seq data
106	PMID: 27056547			The records not having RNA-Seq data
107	PMID: 27039294			The records not having RNA-Seq data
108	PMID: 28071620			The records not having RNA-Seq data
109	PMID: 28071622			The records not having RNA-Seq data
110	PMID: 27461591			Non relevant review
111	PMID: 27461592			The records not having RNA-Seq data
112	PMID: 27461593			Non relevant review
113	PMID: 27461598			Non relevant review
114	PMID: 27461611			The records not having RNA-Seq data
115	PMID: 27461623			The records not having RNA-Seq data
116	PMID: 27461633			The records not having RNA-Seq data
117	PMID: 27461660			The records not having RNA-Seq data
118	PMID: 27461669			The records not having RNA-Seq data
119	PMID: 27461673			The records not having RNA-Seq data
120	PMID: 27461677			The records not having RNA-Seq data
121	PMID: 27461683			The records not having RNA-Seq data
122	PMID: 27461703			The records not having RNA-Seq data
123	PMID: 27043631			Non relevant review
124	PMID: 27012522			The records not having RNA-Seq data
125	PMID: 27012679			The records not having RNA-Seq data
126	PMID: 27001663			The records not having RNA-Seq data
127	PMID: 27000157			The records not having RNA-Seq data
128	PMID: 26995190			The records not having RNA-Seq data
129	PMID: 26993269			The records not having RNA-Seq data
130	PMID: 26975503			The records not having RNA-Seq data
131	PMID: 26951044			The records not having RNA-Seq data
132	PMID: 26951089			The records not having RNA-Seq data
133	PMID: 26940728			The records not having RNA-Seq data
134	PMID: 26940066			The records not having RNA-Seq data
135	PMID: 26679292			The records not having RNA-Seq data
136	PMID: 26798989			The records not having RNA-Seq data
137	PMID: 26818916			The records not having RNA-Seq data
138	PMID: 26927178			The records not having RNA-Seq data
139	PMID: 26926144			The records not having RNA-Seq data
140	PMID: 26922239			The records not having RNA-Seq data
141	PMID: 26906330			The records not having RNA-Seq data
142	PMID: 26892607			The records not having RNA-Seq data
143	PMID: 26892430			The records not having RNA-Seq data
144	PMID: 26884234			The records not having RNA-Seq data
145	PMID: 26884055			The records not having RNA-Seq data
146	PMID: 26879049			The records not having RNA-Seq data
147	PMID: 26858129			The records not having RNA-Seq data
148	PMID: 26711175			The records not having RNA-Seq data
149	PMID: 26907349			Non relevant review
150	PMID: 26822763			The records not having RNA-Seq data
151	PMID: 26817597			The records not having RNA-Seq data
152	PMID: 26812901			The records not having RNA-Seq data
153	PMID: 26795575			The records having RNA-Seq data but were not analyzed for identifying alternate splicing
154	PMID: 26795730			The records not having RNA-Seq data
155	PMID: 26792072			The records not having RNA-Seq data
156	PMID: 26769084			The records not having RNA-Seq data
157	PMID: 26768732			The records not having RNA-Seq data
158	PMID: 26754630			The records not having RNA-Seq data
159	PMID: 26738743			The records not having RNA-Seq data
160	PMID: 26739148			The records not having RNA-Seq data
161	PMID: 26728009			The records not having RNA-Seq data
162	PMID: 26742076			The records not having RNA-Seq data
163	PMID: 26751478			The records not having RNA-Seq data
164	PMID: 27698909			The records not having RNA-Seq data
165	PMID: 27877215			The records not having RNA-Seq data
166	PMID: 27877233			The records not having RNA-Seq data
167	PMID: 27994655			The records not having RNA-Seq data
168	PMID: 27994675			The records not having RNA-Seq data
169	PMID: 27920556			The records not having RNA-Seq data
170	PMID: 27826202			The records not having RNA-Seq data
171	PMID: 27843328			The records not having RNA-Seq data
172	PMID: 27853378			The records not having RNA-Seq data
173	PMID: 27895493			The records not having RNA-Seq data
174	PMID: 27822060			The records not having RNA-Seq data
175	PMID: 27822066			The records not having RNA-Seq data
176	PMID: 27785067			The records not having RNA-Seq data
177	PMID: 27785076			The records not having RNA-Seq data
178	PMID: 27695345			The records not having RNA-Seq data
179	PMID: 27729804			The records not having RNA-Seq data
180	PMID: 27574453			The records not having RNA-Seq data
181	PMID: 27536142			The records not having RNA-Seq data
182	PMID: 27471552			The records not having RNA-Seq data
183	PMID: 27471556			The records not having RNA-Seq data
184	PMID: 27471562			The records not having RNA-Seq data
185	PMID: 27524909			The records not having RNA-Seq data
186	PMID: 27445495			The records not having RNA-Seq data
187	PMID: 27468239			Records on cancers other than head and neck region
188	PMID: 27390592			The records not having RNA-Seq data
189	PMID: 27390611			The records not having RNA-Seq data
190	PMID: 27072211			The records not having RNA-Seq data
191	PMID: 27072227			The records not having RNA-Seq data
192	PMID: 27072239			The records not having RNA-Seq data
193	PMID: 27072243			The records not having RNA-Seq data
194	PMID: 27072254			The records not having RNA-Seq data
195	PMID: 27366095			The records not having RNA-Seq data
196	PMID: 27350753			The records not having RNA-Seq data
197	PMID: 27162533			The records not having RNA-Seq data
198	PMID: 27162535			The records not having RNA-Seq data
199	PMID: 27313793			The records not having RNA-Seq data
200	PMID: 27326252			The records not having RNA-Seq data
201	PMID: 27330306			The records not having RNA-Seq data
202	PMID: 27146732			The records not having RNA-Seq data
203	PMID: 27146764			The records not having RNA-Seq data
204	PMID: 27146770			The records not having RNA-Seq data
205	PMID: 27274283			The records not having RNA-Seq data
206	PMID: 27274286			The records not having RNA-Seq data
207	PMID: 27284257			The records not having RNA-Seq data
208	PMID: 27143931			Non relevant review
209	PMID: 27217768			The records not having RNA-Seq data
210	PMID: 27217776			The records not having RNA-Seq data
211	PMID: 27143919			The records not having RNA-Seq data
212	PMID: 27143925			The records not having RNA-Seq data
213	PMID: 26918051			The records not having RNA-Seq data
214	PMID: 27053959			The records not having RNA-Seq data
215	PMID: 27076847			The records not having RNA-Seq data
216	PMID: 27076852			The records not having RNA-Seq data
217	PMID: 27076856			The records not having RNA-Seq data
218	PMID: 27110122			The records not having RNA-Seq data
219	PMID: 27099518			The records not having RNA-Seq data
220	PMID: 27051302			The records not having RNA-Seq data
221	PMID: 27042128			The records not having RNA-Seq data
222	PMID: 26985197			The records not having RNA-Seq data
223	PMID: 26985198			The records not having RNA-Seq data
224	PMID: 27051294			The records not having RNA-Seq data
225	PMID: 27051300			The records not having RNA-Seq data
226	PMID: 26918040			The records not having RNA-Seq data
227	PMID: 26929646			The records not having RNA-Seq data
228	PMID: 26869799			The records not having RNA-Seq data
229	PMID: 26714970			The records not having RNA-Seq data
230	PMID: 26701749			The records not having RNA-Seq data
231	PMID: 26694863			The records not having RNA-Seq data
232	PMID: 26690371			The records not having RNA-Seq data
233	PMID: 26690818			The records not having RNA-Seq data
234	PMID: 26675171			The records on viruses
235	PMID: 26675209			The records not having RNA-Seq data
236	PMID: 26672675			The records not having RNA-Seq data
237	PMID: 26637471			The records not having RNA-Seq data
238	PMID: 26634247			The records not having RNA-Seq data
239	PMID: 26728682			The records not having RNA-Seq data
240	PMID: 26362844			The records not having RNA-Seq data
241	PMID: 26471244			The records not having RNA-Seq data
242	PMID: 26692526			The records not having RNA-Seq data
243	PMID: 26506389			Non relevant review
244	PMID: 26561835			The records not having RNA-Seq data
245	PMID: 26569309			The records not having RNA-Seq data
246	PMID: 26690219			The records not having RNA-Seq data
247	PMID: 26690220			The records not having RNA-Seq data
248	PMID: 26606926			The records not having RNA-Seq data
249	PMID: 26603423			The records not having RNA-Seq data
250	PMID: 26573573			The records not having RNA-Seq data
251	PMID: 26555193			The records not having RNA-Seq data
252	PMID: 26552376			The records not having RNA-Seq data
253	PMID: 26553007			The records not having RNA-Seq data
254	PMID: 26557156			The records not having RNA-Seq data
255	PMID: 26545583			The records not having RNA-Seq data
256	PMID: 26545861			The records not having RNA-Seq data
257	PMID: 26545871			The records not having RNA-Seq data
258	PMID: 26816501			The records not having RNA-Seq data
259	PMID: 26310711			The records not having RNA-Seq data
260	PMID: 26470851			The records not having RNA-Seq data
261	PMID: 26520570			The records not having RNA-Seq data
262	PMID: 26506820			The records not having RNA-Seq data
263	PMID: 26503504			The records not having RNA-Seq data
264	PMID: 26503699			The records not having RNA-Seq data
265	PMID: 26482899			The records not having RNA-Seq data
266	PMID: 26483189			The records not having RNA-Seq data
267	PMID: 26475344			The records not having RNA-Seq data
268	PMID: 26471496			The records not having RNA-Seq data
269	PMID: 26472233			The records not having RNA-Seq data
270	PMID: 26471020			The records not having RNA-Seq data
271	PMID: 26472042			The records having RNA-Seq data but were not analyzed for identifying alternate splicing
272	PMID: 26459302			Non relevant review
273	PMID: 26462255			The records not having RNA-Seq data
274	PMID: 26960459			The records not having RNA-Seq data
275	PMID: 26960495			The records not having RNA-Seq data
276	PMID: 26960498			The records not having RNA-Seq data
277	PMID: 26960500			The records not having RNA-Seq data
278	PMID: 26960501			The records not having RNA-Seq data
279	PMID: 26881508			The records not having RNA-Seq data
280	PMID: 26881516			The records not having RNA-Seq data
281	PMID: 26881537			The records not having RNA-Seq data
282	PMID: 26881641			The records not having RNA-Seq data
283	PMID: 26881631			The records not having RNA-Seq data
284	PMID: 26881601			The records not having RNA-Seq data
285	PMID: 26881633			The records not having RNA-Seq data
286	PMID: 26881639			The records not having RNA-Seq data
287	PMID: 26506882			The records not having RNA-Seq data
288	PMID: 26506877			The records not having RNA-Seq data
289	PMID: 26506872			The records not having RNA-Seq data
290	PMID: 26506868			The records not having RNA-Seq data
291	PMID: 26506880			The records not having RNA-Seq data
292	PMID: 26506874			The records not having RNA-Seq data
293	PMID: 26506881			The records not having RNA-Seq data
294	PMID: 26506866			The records not having RNA-Seq data
295	PMID: 26506867			The records not having RNA-Seq data
296	PMID: 26194878			The records not having RNA-Seq data
297	PMID: 26250857			The records not having RNA-Seq data
298	PMID: 26419914			The records not having RNA-Seq data
299	PMID: 26420726			The records not having RNA-Seq data
300	PMID: 26407897			The records not having RNA-Seq data
301	PMID: 26404490			The records not having RNA-Seq data
302	PMID: 26388702			The records not having RNA-Seq data
303	PMID: 26377685			The records not having RNA-Seq data
304	PMID: 26381239			The records not having RNA-Seq data
305	PMID: 26369827			The records not having RNA-Seq data
306	PMID: 26361755			The records not having RNA-Seq data
307	PMID: 26353754			The records not having RNA-Seq data
308	PMID: 26082292			The records not having RNA-Seq data
309	PMID: 26445606			The records not having RNA-Seq data
310	PMID: 26036622			The records not having RNA-Seq data
311	PMID: 26120967			The records not having RNA-Seq data
312	PMID: 26343729			Non relevant review
313	PMID: 26404378			The records not having RNA-Seq data
314	PMID: 26311588			The records not having RNA-Seq data
315	PMID: 26307051			The records not having RNA-Seq data
316	PMID: 26302761			The records not having RNA-Seq data
317	PMID: 26300994			The records not having RNA-Seq data
318	PMID: 26292957			The records not having RNA-Seq data
319	PMID: 26275421			The records not having RNA-Seq data
320	PMID: 26264052			The records not having RNA-Seq data
321	PMID: 26259597			The records not having RNA-Seq data
322	PMID: 26253488			The records not having RNA-Seq data
323	PMID: 25991077			The records not having RNA-Seq data
324	PMID: 26228921			The records not having RNA-Seq data
325	PMID: 26223311			The records not having RNA-Seq data
326	PMID: 26225121			The records not having RNA-Seq data
327	PMID: 26215037			The records not having RNA-Seq data
328	PMID: 26205886			The records not having RNA-Seq data
329	PMID: 26179387			The records not having RNA-Seq data
330	PMID: 26163015			The records not having RNA-Seq data
331	PMID: 26905147			The records not having RNA-Seq data
332	PMID: 26905153			The records not having RNA-Seq data
333	PMID: 26458654			The records not having RNA-Seq data
334	PMID: 26458663			The records not having RNA-Seq data
335	PMID: 26458645			The records not having RNA-Seq data
336	PMID: 26458715			The records not having RNA-Seq data
337	PMID: 26458630			The records not having RNA-Seq data
338	PMID: 26458649			The records not having RNA-Seq data
339	PMID: 25924914			The records not having RNA-Seq data
340	PMID: 25919147			Non relevant review
341	PMID: 26122711			The records not having RNA-Seq data
342	PMID: 26112272			The records not having RNA-Seq data
343	PMID: 26106283			The records not having RNA-Seq data
344	PMID: 26067059			The records not having RNA-Seq data
345	PMID: 26063113			The records not having RNA-Seq data
346	PMID: 26055874			The records not having RNA-Seq data
347	PMID: 25781202			The records not having RNA-Seq data
348	PMID: 25836654			Non relevant review
349	PMID: 26029027			The records not having RNA-Seq data
350	PMID: 26024915			The records not having RNA-Seq data
351	PMID: 26019688			The records not having RNA-Seq data
352	PMID: 26003145			The records not having RNA-Seq data
353	PMID: 26058563			The records not having RNA-Seq data
354	PMID: 25990935			The records not having RNA-Seq data
355	PMID: 27119105			The records not having RNA-Seq data
356	PMID: 25976920			The records not having RNA-Seq data
357	PMID: 25971451			The records not having RNA-Seq data
358	PMID: 26058679			The records not having RNA-Seq data
359	PMID: 25956553			The records not having RNA-Seq data
360	PMID: 25958199			The records not having RNA-Seq data
361	PMID: 25943747			The records not having RNA-Seq data
362	PMID: 25935541			The records not having RNA-Seq data
363	PMID: 26207112			The records not having RNA-Seq data
364	PMID: 25619980			The records not having RNA-Seq data
365	PMID: 25644496			The records not having RNA-Seq data
366	PMID: 25929687			The records not having RNA-Seq data
367	PMID: 25925041			The records not having RNA-Seq data
368	PMID: 25924850			The records not having RNA-Seq data
369	PMID: 25927572			The records not having RNA-Seq data
370	PMID: 25903652			The records not having RNA-Seq data
371	PMID: 25896830			The records not having RNA-Seq data
372	PMID: 25908938			The records not having RNA-Seq data
373	PMID: 25881159			The records not having RNA-Seq data
374	PMID: 25889801			The records not having RNA-Seq data
375	PMID: 25885444			The records not having RNA-Seq data
376	PMID: 25963410			The records not having RNA-Seq data
377	PMID: 25889482			The records not having RNA-Seq data
378	PMID: 26853418			Non relevant review
379	PMID: 26148583			The records not having RNA-Seq data
380	PMID: 26148585			The records not having RNA-Seq data
381	PMID: 26148586			The records not having RNA-Seq data
382	PMID: 26148622			The records not having RNA-Seq data
383	PMID: 25926078			The records not having RNA-Seq data
384	PMID: 25619559			The records not having RNA-Seq data
385	PMID: 25644715			The records not having RNA-Seq data
386	PMID: 25893634			The records not having RNA-Seq data
387	PMID: 25885343			The records not having RNA-Seq data
388	PMID: 25889937			The records not having RNA-Seq data
389	PMID: 25885109			The records not having RNA-Seq data
390	PMID: 25889705			The records not having RNA-Seq data
391	PMID: 25868613			The records not having RNA-Seq data
392	PMID: 25962816			The records not having RNA-Seq data
393	PMID: 25962737			The records not having RNA-Seq data
394	PMID: 26034496			The records not having RNA-Seq data
395	PMID: 25810010			The records not having RNA-Seq data
396	PMID: 25810697			The records not having RNA-Seq data
397	PMID: 25810702			The records not having RNA-Seq data
398	PMID: 25734659			Non relevant review
399	PMID: 25890009			The records not having RNA-Seq data
400	PMID: 25880247			The records not having RNA-Seq data
401	PMID: 25849024			The records not having RNA-Seq data
402	PMID: 25705250			The records on viruses
403	PMID: 25889704			The records not having RNA-Seq data
404	PMID: 25880731			The records not having RNA-Seq data
405	PMID: 25885366			The records not having RNA-Seq data
406	PMID: 25645517			The records not having RNA-Seq data
407	PMID: 25492592			The records not having RNA-Seq data
408	PMID: 25622525			The records not having RNA-Seq data
409	PMID: 25612635			The records not having RNA-Seq data
410	PMID: 25595218			The records not having RNA-Seq data
411	PMID: 25679310			The records not having RNA-Seq data
412	PMID: 25582731			The records not having RNA-Seq data
413	PMID: 25573091			The records not having RNA-Seq data
414	PMID: 25566697			The records not having RNA-Seq data
415	PMID: 25566789			The records not having RNA-Seq data
416	PMID: 26837973			The records not having RNA-Seq data
417	PMID: 26837976			The records not having RNA-Seq data
418	PMID: 26837977			The records not having RNA-Seq data
419	PMID: 26837979			The records not having RNA-Seq data
420	PMID: 26837983			The records not having RNA-Seq data
421	PMID: 26837985			The records not having RNA-Seq data
422	PMID: 26535066			The records not having RNA-Seq data
423	PMID: 26535067			The records not having RNA-Seq data
424	PMID: 26640587			The records not having RNA-Seq data
425	PMID: 26604795			The records not having RNA-Seq data
426	PMID: 26604792			The records not having RNA-Seq data
427	PMID: 26635481			The records not having RNA-Seq data
428	PMID: 26604781			The records not having RNA-Seq data
429	PMID: 26504400			The records not having RNA-Seq data
430	PMID: 26457244			The records not having RNA-Seq data
431	PMID: 26396530			The records not having RNA-Seq data
432	PMID: 26284140			The records not having RNA-Seq data
433	PMID: 26346890			The records not having RNA-Seq data
434	PMID: 26170698			The records not having RNA-Seq data
435	PMID: 26109869			The records not having RNA-Seq data
436	PMID: 26089682			The records not having RNA-Seq data
437	PMID: 26082647			The records not having RNA-Seq data
438	PMID: 26000040			The records not having RNA-Seq data
439	PMID: 25879331			The records not having RNA-Seq data
440	PMID: 25879333			The records not having RNA-Seq data
441	PMID: 25879341			The records not having RNA-Seq data
442	PMID: 25879348			The records not having RNA-Seq data
443	PMID: 25879352			The records not having RNA-Seq data
444	PMID: 25879353			The records not having RNA-Seq data
445	PMID: 25879359			The records not having RNA-Seq data
446	PMID: 25879362			The records not having RNA-Seq data
447	PMID: 25999732			The records not having RNA-Seq data
448	PMID: 25767599			The records not having RNA-Seq data
449	PMID: 25767602			The records not having RNA-Seq data
450	PMID: 25653721			The records not having RNA-Seq data
451	PMID: 25553093			The records not having RNA-Seq data
452	PMID: 25759589			The records not having RNA-Seq data
453	PMID: 25338734			The records not having RNA-Seq data
454	PMID: 25678800			The records not having RNA-Seq data
455	PMID: 25622907			The records not having RNA-Seq data
456	PMID: 25355701			The records not having RNA-Seq data
457	PMID: 25670907			The records not having RNA-Seq data
458	PMID: 25551195			The records not having RNA-Seq data
459	PMID: 25544371			The records not having RNA-Seq data
460	PMID: 25544268			The records not having RNA-Seq data
461	PMID: 25685059			The records not having RNA-Seq data
462	PMID: 25527207			The records not having RNA-Seq data
463	PMID: 25539663			The records not having RNA-Seq data
464	PMID: 25515630			The records on viruses
465	PMID: 25519023			The records not having RNA-Seq data
466	PMID: 25495785			The records not having RNA-Seq data
467	PMID: 25477058			The records not having RNA-Seq data
468	PMID: 25500088			The records not having RNA-Seq data
469	PMID: 25526252			The records not having RNA-Seq data
470	PMID: 25081631			The records not having RNA-Seq data
471	PMID: 25297925			The records not having RNA-Seq data
472	PMID: 25418193			The records on viruses
473	PMID: 25418194			The records not having RNA-Seq data
474	PMID: 25435845			The records not having RNA-Seq data
475	PMID: 25432818			The records not having RNA-Seq data
476	PMID: 25479896			The records not having RNA-Seq data
477	PMID: 25424191			The records not having RNA-Seq data
478	PMID: 25424420			The records not having RNA-Seq data
479	PMID: 25427424			The records not having RNA-Seq data
480	PMID: 25421331			The records not having RNA-Seq data
481	PMID: 25413127			The records not having RNA-Seq data
482	PMID: 25407100			The records not having RNA-Seq data
483	PMID: 25866477			The records not having RNA-Seq data
484	PMID: 25407966			The records not having RNA-Seq data
485	PMID: 25403714			The records not having RNA-Seq data
486	PMID: 25376591			The records not having RNA-Seq data
487	PMID: 25366703			The records not having RNA-Seq data
488	PMID: 25362970			The records not having RNA-Seq data
489	PMID: 25450269			The records not having RNA-Seq data
490	PMID: 25450267			The records not having RNA-Seq data
491	PMID: 25223912			Non relevant review
492	PMID: 25367334			The records not having RNA-Seq data
493	PMID: 25367335			Non relevant review
494	PMID: 25348872			The records not having RNA-Seq data
495	PMID: 25351202			The records not having RNA-Seq data
496	PMID: 25338638			The records not having RNA-Seq data
497	PMID: 25317078			The records not having RNA-Seq data
498	PMID: 25389449			The records not having RNA-Seq data
499	PMID: 25045041			The records not having RNA-Seq data
500	PMID: 25579526			The records not having RNA-Seq data
501	PMID: 25579527			The records not having RNA-Seq data
502	PMID: 25579529			The records not having RNA-Seq data
503	PMID: 25579548			The records not having RNA-Seq data
504	PMID: 25379016			The records not having RNA-Seq data
505	PMID: 25011457			Non relevant review
506	PMID: 25260646			The records not having RNA-Seq data
507	PMID: 25245141			The records not having RNA-Seq data
508	PMID: 25245041			The records not having RNA-Seq data
509	PMID: 25233933			The records not having RNA-Seq data
510	PMID: 25189623			The records not having RNA-Seq data
511	PMID: 25190181			The records not having RNA-Seq data
512	PMID: 25182342			The records not having RNA-Seq data
513	PMID: 25256828			Non relevant review
514	PMID: 25226287			Non relevant review
515	PMID: 25177236			The records not having RNA-Seq data
516	PMID: 25197261			The records not having RNA-Seq data
517	PMID: 25145705			The records not having RNA-Seq data
518	PMID: 25127876			The records not having RNA-Seq data
519	PMID: 25115815			The records not having RNA-Seq data
520	PMID: 25109220			The records not having RNA-Seq data
521	PMID: 25098939			The records not having RNA-Seq data
522	PMID: 25098679			The records not having RNA-Seq data
523	PMID: 24890018			The records not having RNA-Seq data
524	PMID: 25171890			The records not having RNA-Seq data
525	PMID: 25171891			The records not having RNA-Seq data
526	PMID: 25171892			The records not having RNA-Seq data
527	PMID: 25096544			The records not having RNA-Seq data
528	PMID: 25042135			The records not having RNA-Seq data
529	PMID: 25027948			The records not having RNA-Seq data
530	PMID: 25027955			The records not having RNA-Seq data
531	PMID: 25011678			The records not having RNA-Seq data
532	PMID: 25313726			Non relevant review
533	PMID: 25313727			Non relevant review
534	PMID: 25313730			Non relevant review
535	PMID: 25494107			The records not having RNA-Seq data
536	PMID: 25494110			The records not having RNA-Seq data
537	PMID: 25494111			The records not having RNA-Seq data
538	PMID: 24815674			The records not having RNA-Seq data
539	PMID: 24874644			The records not having RNA-Seq data
540	PMID: 24973959			The records not having RNA-Seq data
541	PMID: 24969046			The records not having RNA-Seq data
542	PMID: 24961145			The records not having RNA-Seq data
543	PMID: 24931737			The records not having RNA-Seq data
544	PMID: 24928361			The records not having RNA-Seq data
545	PMID: 24923533			The records not having RNA-Seq data
546	PMID: 24928086			The records not having RNA-Seq data
547	PMID: 24919963			The records not having RNA-Seq data
548	PMID: 24912482			The records not having RNA-Seq data
549	PMID: 24893577			The records not having RNA-Seq data
550	PMID: 24862538			The records not having RNA-Seq data
551	PMID: 24703594			The records not having RNA-Seq data
552	PMID: 24698959			The records not having RNA-Seq data
553	PMID: 24884513			The records not having RNA-Seq data
554	PMID: 24885222			The records not having RNA-Seq data
555	PMID: 24885829			The records not having RNA-Seq data
556	PMID: 24886439			The records not having RNA-Seq data
557	PMID: 24886209			The records not having RNA-Seq data
558	PMID: 24885469			The records not having RNA-Seq data
559	PMID: 24885244			The records not having RNA-Seq data
560	PMID: 24884612			The records not having RNA-Seq data
561	PMID: 24884880			The records not having RNA-Seq data
562	PMID: 24887090			The records not having RNA-Seq data
563	PMID: 24885002			The records not having RNA-Seq data
564	PMID: 24886308			The records not having RNA-Seq data
565	PMID: 24165896			The records not having RNA-Seq data
566	PMID: 22505597			The records not having RNA-Seq data
567	PMID: 25609190			The records not having RNA-Seq data
568	PMID: 25608735			The records not having RNA-Seq data
569	PMID: 24767405			The records not having RNA-Seq data
570	PMID: 24767179			The records not having RNA-Seq data
571	PMID: 24766948			The records not having RNA-Seq data
572	PMID: 24761979			The records not having RNA-Seq data
573	PMID: 24758564			The records not having RNA-Seq data
574	PMID: 24751144			The records not having RNA-Seq data
575	PMID: 24750665			The records not having RNA-Seq data
576	PMID: 24742019			The records not having RNA-Seq data
577	PMID: 24725381			The records not having RNA-Seq data
578	PMID: 24725344			The records not having RNA-Seq data
579	PMID: 24708550			The records not having RNA-Seq data
580	PMID: 24415717			The records not having RNA-Seq data
581	PMID: 24497500			The records not having RNA-Seq data
582	PMID: 24515895			The records not having RNA-Seq data
583	PMID: 24510528			The records not having RNA-Seq data
584	PMID: 25022371			The records not having RNA-Seq data
585	PMID: 25022373			The records not having RNA-Seq data
586	PMID: 25022375			The records not having RNA-Seq data
587	PMID: 25022379			The records not having RNA-Seq data
588	PMID: 25022400			The records not having RNA-Seq data
589	PMID: 25104184			The records not having RNA-Seq data
590	PMID: 25104185			The records not having RNA-Seq data
591	PMID: 25104187			The records not having RNA-Seq data
592	PMID: 24521534			The records not having RNA-Seq data
593	PMID: 24678902			The records not having RNA-Seq data
594	PMID: 24674015			The records not having RNA-Seq data
595	PMID: 24666435			The records not having RNA-Seq data
596	PMID: 24629046			The records not having RNA-Seq data
597	PMID: 24612587			The records not having RNA-Seq data
598	PMID: 24606633			The records not having RNA-Seq data
599	PMID: 24606961			The records not having RNA-Seq data
600	PMID: 24602316			The records not having RNA-Seq data
601	PMID: 24593279			The records not having RNA-Seq data
602	PMID: 23958058			The records not having RNA-Seq data
603	PMID: 24531055			Non relevant review
604	PMID: 24581393			The records not having RNA-Seq data
605	PMID: 24587773			Non relevant review
606	PMID: 24587778			The records not having RNA-Seq data
607	PMID: 24571531			The records not having RNA-Seq data
608	PMID: 24555575			The records not having RNA-Seq data
609	PMID: 24555657			The records not having RNA-Seq data
610	PMID: 24552293			The records not having RNA-Seq data
611	PMID: 24533569			The records not having RNA-Seq data
612	PMID: 24512755			The records not having RNA-Seq data
613	PMID: 24507476			The records not having RNA-Seq data
614	PMID: 24495306			The records not having RNA-Seq data
615	PMID: 24709421			The records not having RNA-Seq data
616	PMID: 24709424			The records not having RNA-Seq data
617	PMID: 24460780			The records not having RNA-Seq data
618	PMID: 24423415			The records not having RNA-Seq data
619	PMID: 24410905			The records not having RNA-Seq data
620	PMID: 24410957			The records not having RNA-Seq data
621	PMID: 24411006			The records not having RNA-Seq data
622	PMID: 24393418			The records not having RNA-Seq data
623	PMID: 25653540			The records not having RNA-Seq data
624	PMID: 25763326			Non relevant review
625	PMID: 25763315			The records not having RNA-Seq data
626	PMID: 25246801			The records not having RNA-Seq data
627	PMID: 25214794			The records not having RNA-Seq data
628	PMID: 24947091			The records not having RNA-Seq data
629	PMID: 24947100			The records not having RNA-Seq data
630	PMID: 24868167			The records not having RNA-Seq data
631	PMID: 24762487			The records not having RNA-Seq data
632	PMID: 24762505			The records not having RNA-Seq data
633	PMID: 24762506			The records not having RNA-Seq data
634	PMID: 24648744			The records not having RNA-Seq data
635	PMID: 24672248			The records not having RNA-Seq data
636	PMID: 24168112			The records not having RNA-Seq data
637	PMID: 24611017			Non relevant review
638	PMID: 24380387			The records not having RNA-Seq data
639	PMID: 24373621			The records not having RNA-Seq data
640	PMID: 24373220			The records not having RNA-Seq data
641	PMID: 24330540			The records not having RNA-Seq data
642	PMID: 24330498			The records not having RNA-Seq data
643	PMID: 24592140			The records not having RNA-Seq data
644	PMID: 24289313			The records not having RNA-Seq data
645	PMID: 24403253			The records not having RNA-Seq data
646	PMID: 24403269			The records not having RNA-Seq data
647	PMID: 24403272			The records not having RNA-Seq data
648	PMID: 24286495			The records not having RNA-Seq data
649	PMID: 24261884			The records not having RNA-Seq data
650	PMID: 24252126			The records not having RNA-Seq data
651	PMID: 24237861			The records not having RNA-Seq data
652	PMID: 24219818			The records not having RNA-Seq data
653	PMID: 24209638			The records not having RNA-Seq data
654	PMID: 24196030			The records not having RNA-Seq data
655	PMID: 24192080			The records not having RNA-Seq data
656	PMID: 24188789			The records not having RNA-Seq data
657	PMID: 24192223			The records not having RNA-Seq data
658	PMID: 24165756			The records not having RNA-Seq data
659	PMID: 24156782			The records not having RNA-Seq data
660	PMID: 24138931			The records not having RNA-Seq data
661	PMID: 24139288			The records not having RNA-Seq data
662	PMID: 24125432			The records not having RNA-Seq data
663	PMID: 24094078			The records not having RNA-Seq data
664	PMID: 24090107			The records not having RNA-Seq data
665	PMID: 24083351			The records not having RNA-Seq data
666	PMID: 24369206			The records not having RNA-Seq data
667	PMID: 24369209			The records not having RNA-Seq data
668	PMID: 24369216			The records not having RNA-Seq data
669	PMID: 24518700			Non relevant review
670	PMID: 24518701			The records not having RNA-Seq data
671	PMID: 24518704			The records not having RNA-Seq data
672	PMID: 24518705			The records not having RNA-Seq data
673	PMID: 24518706			The records not having RNA-Seq data
674	PMID: 24518707			The records not having RNA-Seq data
675	PMID: 24079363			The records not having RNA-Seq data
676	PMID: 24063540			The records not having RNA-Seq data
677	PMID: 24044722			The records not having RNA-Seq data
678	PMID: 24034781			The records not having RNA-Seq data
679	PMID: 24020432			The records not having RNA-Seq data
680	PMID: 24006899			The records not having RNA-Seq data
681	PMID: 24007375			The records not having RNA-Seq data
682	PMID: 24592119			The records not having RNA-Seq data
683	PMID: 24592125			The records not having RNA-Seq data
684	PMID: 24018643			The records not having RNA-Seq data
685	PMID: 23978128			The records not having RNA-Seq data
686	PMID: 23962337			The records not having RNA-Seq data
687	PMID: 23941622			The records not having RNA-Seq data
688	PMID: 23941693			The records not having RNA-Seq data
689	PMID: 23938045			The records not having RNA-Seq data
690	PMID: 23915314			The records not having RNA-Seq data
691	PMID: 23915735			The records on viruses
692	PMID: 23908686			The records not having RNA-Seq data
693	PMID: 23870134			The records not having RNA-Seq data
694	PMID: 23855804			The records not having RNA-Seq data
695	PMID: 23829309			The records not having RNA-Seq data
696	PMID: 23826875			The records not having RNA-Seq data
697	PMID: 24125971			The records not having RNA-Seq data
698	PMID: 24126006			The records not having RNA-Seq data
699	PMID: 23814492			The records not having RNA-Seq data
700	PMID: 23815869			The records not having RNA-Seq data
701	PMID: 23815822			The records not having RNA-Seq data
702	PMID: 23815987			The records not having RNA-Seq data
703	PMID: 23806065			The records not having RNA-Seq data
704	PMID: 23803252			The records not having RNA-Seq data
705	PMID: 23786757			The records not having RNA-Seq data
706	PMID: 23782497			The records not having RNA-Seq data
707	PMID: 23782473			The records not having RNA-Seq data
708	PMID: 23777485			The records not having RNA-Seq data
709	PMID: 23758795			The records not having RNA-Seq data
710	PMID: 23758864			The records not having RNA-Seq data
711	PMID: 23730406			The records not having RNA-Seq data
712	PMID: 23730414			The records not having RNA-Seq data
713	PMID: 23730210			The records not having RNA-Seq data
714	PMID: 24596514			The records not having RNA-Seq data
715	PMID: 23930212			The records not having RNA-Seq data
716	PMID: 23721111			The records not having RNA-Seq data
717	PMID: 23718900			The records not having RNA-Seq data
718	PMID: 23710609			The records not having RNA-Seq data
719	PMID: 23710879			The records not having RNA-Seq data
720	PMID: 23675829			The records not having RNA-Seq data
721	PMID: 23672519			The records not having RNA-Seq data
722	PMID: 23663243			The records not having RNA-Seq data
723	PMID: 23642234			The records not having RNA-Seq data
724	PMID: 23642182			The records not having RNA-Seq data
725	PMID: 23633918			The records not having RNA-Seq data
726	PMID: 23634757			The records not having RNA-Seq data
727	PMID: 22791311			Non relevant review
728	PMID: 23631652			The records not having RNA-Seq data
729	PMID: 23621873			The records not having RNA-Seq data
730	PMID: 23594504			The records not having RNA-Seq data
731	PMID: 23587173			The records not having RNA-Seq data
732	PMID: 23578338			The records not having RNA-Seq data
733	PMID: 23578324			The records not having RNA-Seq data
734	PMID: 23552362			The records not having RNA-Seq data
735	PMID: 23547760			The records not having RNA-Seq data
736	PMID: 23771366			The records not having RNA-Seq data
737	PMID: 23771372			The records not having RNA-Seq data
738	PMID: 23771375			The records not having RNA-Seq data
739	PMID: 23771382			The records not having RNA-Seq data
740	PMID: 23771386			The records not having RNA-Seq data
741	PMID: 23979205			The records not having RNA-Seq data
742	PMID: 23521779			The records not having RNA-Seq data
743	PMID: 23514246			The records not having RNA-Seq data
744	PMID: 23496845			The records not having RNA-Seq data
745	PMID: 23506259			The records not having RNA-Seq data
746	PMID: 23497198			The records not having RNA-Seq data
747	PMID: 23497185			The records not having RNA-Seq data
748	PMID: 23497031			The records not having RNA-Seq data
749	PMID: 23497365			The records not having RNA-Seq data
750	PMID: 23445779			The records not having RNA-Seq data
751	PMID: 23433435			The records not having RNA-Seq data
752	PMID: 23409748			The records not having RNA-Seq data
753	PMID: 23374258			Non relevant review
754	PMID: 23375119			The records not having RNA-Seq data
755	PMID: 26909271			Non relevant review
756	PMID: 23369221			The records not having RNA-Seq data
757	PMID: 23336282			The records not having RNA-Seq data
758	PMID: 23331666			The records not having RNA-Seq data
759	PMID: 23713035			The records not having RNA-Seq data
760	PMID: 23713038			The records not having RNA-Seq data
761	PMID: 23713039			The records not having RNA-Seq data
762	PMID: 24063698			The records not having RNA-Seq data
763	PMID: 24311943			The records not having RNA-Seq data
764	PMID: 24155776			The records not having RNA-Seq data
765	PMID: 24324343			The records not having RNA-Seq data
766	PMID: 24187501			The records not having RNA-Seq data
767	PMID: 23986644			The records not having RNA-Seq data
768	PMID: 23575081			The records not having RNA-Seq data
769	PMID: 23575086			Non relevant review
770	PMID: 23575100			The records not having RNA-Seq data
771	PMID: 23874107			The records not having RNA-Seq data
772	PMID: 23836993			The records not having RNA-Seq data
773	PMID: 23788836			The records not having RNA-Seq data
774	PMID: 23386906			The records not having RNA-Seq data
775	PMID: 23630424			The records not having RNA-Seq data
776	PMID: 23378773			The records not having RNA-Seq data
777	PMID: 22553254			The records not having RNA-Seq data
778	PMID: 23256610			The records not having RNA-Seq data
779	PMID: 23245290			The records not having RNA-Seq data
780	PMID: 23231769			The records not having RNA-Seq data
781	PMID: 23206972			The records not having RNA-Seq data
782	PMID: 23198710			The records not having RNA-Seq data
783	PMID: 23342279			The records not having RNA-Seq data
784	PMID: 23193977			The records not having RNA-Seq data
785	PMID: 23176396			The records not having RNA-Seq data
786	PMID: 23173732			The records not having RNA-Seq data
787	PMID: 23151022			The records not having RNA-Seq data
788	PMID: 23226094			The records not having RNA-Seq data
789	PMID: 23226095			The records not having RNA-Seq data
790	PMID: 23114230			The records not having RNA-Seq data
791	PMID: 23113946			The records not having RNA-Seq data
792	PMID: 23110497			The records not having RNA-Seq data
793	PMID: 23110587			The records not having RNA-Seq data
794	PMID: 23107277			The records not having RNA-Seq data
795	PMID: 23101561			The records not having RNA-Seq data
796	PMID: 23088283			The records not having RNA-Seq data
797	PMID: 23083099			The records not having RNA-Seq data
798	PMID: 23083061			The records not having RNA-Seq data
799	PMID: 23082988			The records not having RNA-Seq data
800	PMID: 23031071			The records not having RNA-Seq data
801	PMID: 23361279			The records not having RNA-Seq data
802	PMID: 23361280			The records not having RNA-Seq data
803	PMID: 23361287			The records not having RNA-Seq data
804	PMID: 23788927			The records not having RNA-Seq data
805	PMID: 23066440			The records not having RNA-Seq data
806	PMID: 23342270			The records not having RNA-Seq data
807	PMID: 23342272			The records not having RNA-Seq data
808	PMID: 23021083			The records not having RNA-Seq data
809	PMID: 23009663			The records not having RNA-Seq data
810	PMID: 22994655			The records not having RNA-Seq data
811	PMID: 22994622			The records not having RNA-Seq data
812	PMID: 22989046			The records not having RNA-Seq data
813	PMID: 22986368			The records not having RNA-Seq data
814	PMID: 22958729			The records not having RNA-Seq data
815	PMID: 21498473			The records not having RNA-Seq data
816	PMID: 22931099			The records not having RNA-Seq data
817	PMID: 22931894			The records not having RNA-Seq data
818	PMID: 22931165			The records not having RNA-Seq data
819	PMID: 22929110			The records not having RNA-Seq data
820	PMID: 22920673			The records not having RNA-Seq data
821	PMID: 22920680			The records not having RNA-Seq data
822	PMID: 22906006			The records not having RNA-Seq data
823	PMID: 22873792			The records not having RNA-Seq data
824	PMID: 22937181			The records not having RNA-Seq data
825	PMID: 22852863			The records not having RNA-Seq data
826	PMID: 22839099			The records not having RNA-Seq data
827	PMID: 22809533			The records not having RNA-Seq data
828	PMID: 22789070			The records not having RNA-Seq data
829	PMID: 23174719			The records not having RNA-Seq data
830	PMID: 23238150			The records not having RNA-Seq data
831	PMID: 22727408			The records not having RNA-Seq data
832	PMID: 22712549			The records not having RNA-Seq data
833	PMID: 22708791			The records not having RNA-Seq data
834	PMID: 22704542			The records not having RNA-Seq data
835	PMID: 22704532			The records not having RNA-Seq data
836	PMID: 22691269			The records not having RNA-Seq data
837	PMID: 22691266			The records not having RNA-Seq data
838	PMID: 22686297			The records not having RNA-Seq data
839	PMID: 22672838			The records not having RNA-Seq data
840	PMID: 22787428			The records not having RNA-Seq data
841	PMID: 21665877			The records not having RNA-Seq data
842	PMID: 22646734			The records not having RNA-Seq data
843	PMID: 22639817			The records not having RNA-Seq data
844	PMID: 22583829			The records not having RNA-Seq data
845	PMID: 22578076			The records not having RNA-Seq data
846	PMID: 22574757			The records not having RNA-Seq data
847	PMID: 22548841			The records not having RNA-Seq data
848	PMID: 22500814			The records not having RNA-Seq data
849	PMID: 22498108			The records not having RNA-Seq data
850	PMID: 22842371			The records not having RNA-Seq data
851	PMID: 23107973			The records not having RNA-Seq data
852	PMID: 23107975			The records not having RNA-Seq data
853	PMID: 23107976			The records not having RNA-Seq data
854	PMID: 22449259			The records not having RNA-Seq data
855	PMID: 22443202			The records not having RNA-Seq data
856	PMID: 22433671			The records not having RNA-Seq data
857	PMID: 22429900			The records not having RNA-Seq data
858	PMID: 21498475			The records not having RNA-Seq data
859	PMID: 23552555			The records not having RNA-Seq data
860	PMID: 22376902			The records not having RNA-Seq data
861	PMID: 22369429			The records not having RNA-Seq data
862	PMID: 22339894			The records not having RNA-Seq data
863	PMID: 22336657			The records not having RNA-Seq data
864	PMID: 22336097			The records not having RNA-Seq data
865	PMID: 22316341			The records not having RNA-Seq data
866	PMID: 22316381			The records not having RNA-Seq data
867	PMID: 22313843			The records not having RNA-Seq data
868	PMID: 22264292			The records not having RNA-Seq data
869	PMID: 22233756			The records not having RNA-Seq data
870	PMID: 22322734			The records not having RNA-Seq data
871	PMID: 22322736			The records not having RNA-Seq data
872	PMID: 22322727			The records not having RNA-Seq data
873	PMID: 22322730			The records not having RNA-Seq data
874	PMID: 22322731			The records not having RNA-Seq data
875	PMID: 23226027			The records not having RNA-Seq data
876	PMID: 23189032			The records not having RNA-Seq data
877	PMID: 23118544			Non relevant review
878	PMID: 22842160			The records not having RNA-Seq data
879	PMID: 22842161			The records not having RNA-Seq data
880	PMID: 22842162			The records not having RNA-Seq data
881	PMID: 22842163			The records not having RNA-Seq data
882	PMID: 22842164			The records not having RNA-Seq data
883	PMID: 22842166			The records not having RNA-Seq data
884	PMID: 22842167			The records not having RNA-Seq data
885	PMID: 22888261			The records not having RNA-Seq data
886	PMID: 22531512			The records not having RNA-Seq data
887	PMID: 22531518			The records not having RNA-Seq data

## Sheet: Google 1st Nov 2017
S.No	PMID	Tumor type	Software used	Excluded with reason
1	PMID: 26113877	Different head and neck cancer subtypes	MISO
2	PMID: 28733453	HPV-related oropharyngeal squamous cell carcinoma	MapSplice
3	PMID: 27197215	Head and neck squamous cell carcinoma	Suppa
